# Supplementary material
Source: PubMed Central journal article supplement (PMC4689318)
Supplement: NIHMS728617-supplement-Supplemental_Data_File_2.pdf [file NIHMS728617-supplement-Supplemental_Data_File_2.pdf]

**Supplemental Figure S1. Selected forest plots for random effects meta-analyses of prevalence of cancer risk factors among adult persons living with HIV/AIDS in Western high-income countries.**

**(a) Current smoking prevalence among overall<sup>a</sup>**

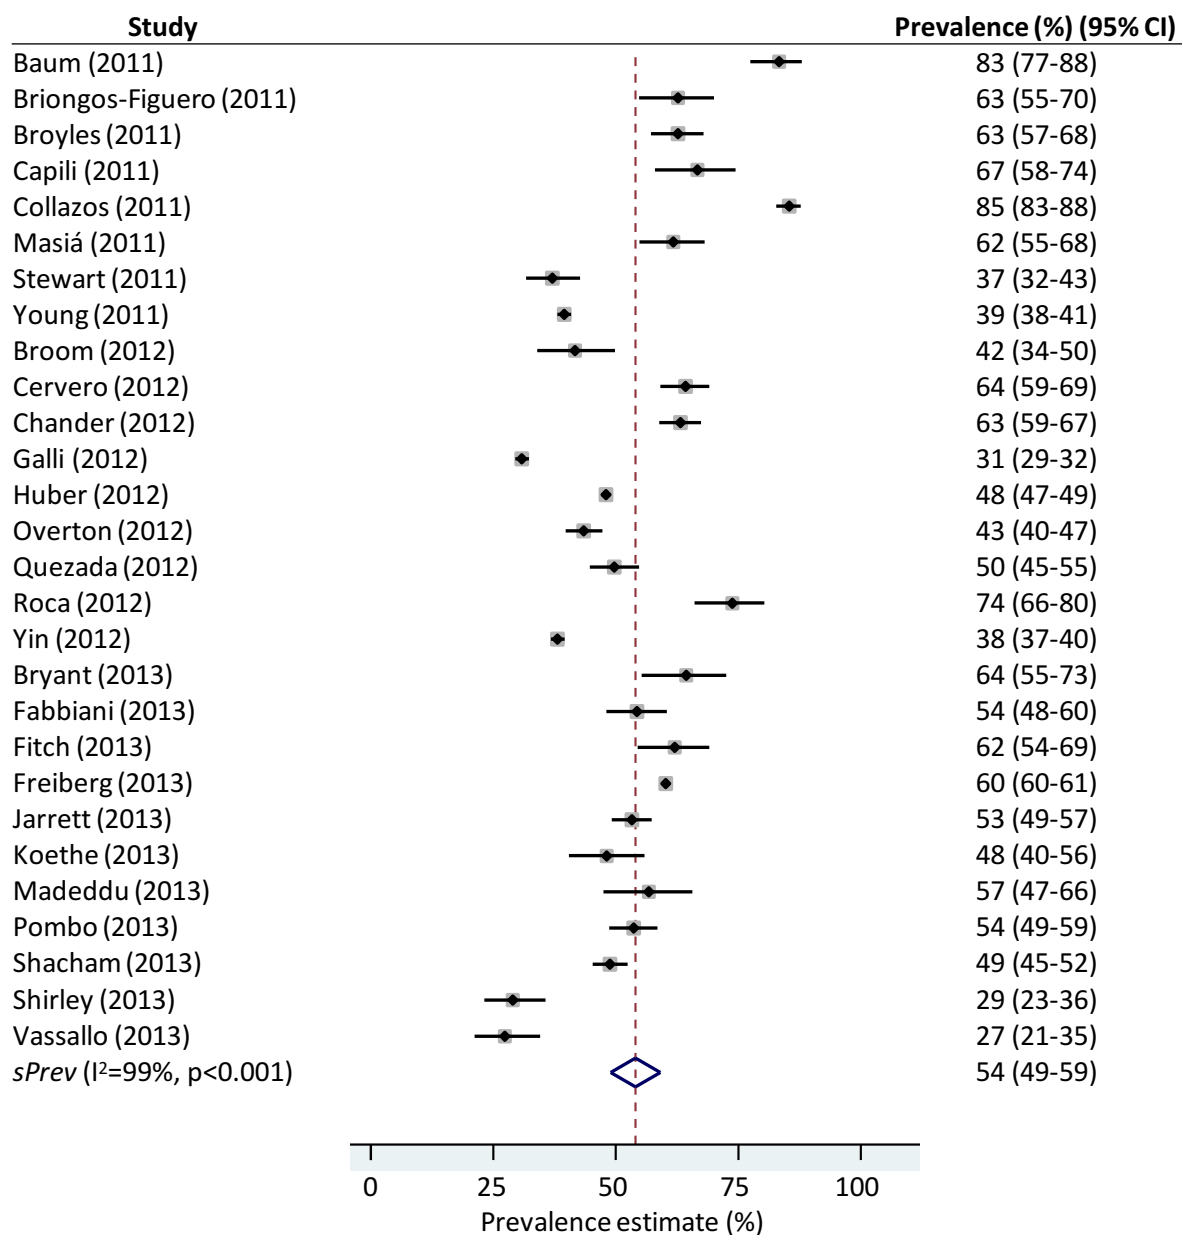

**(b) Hazardous alcohol consumption prevalence among overall<sup>a</sup>**

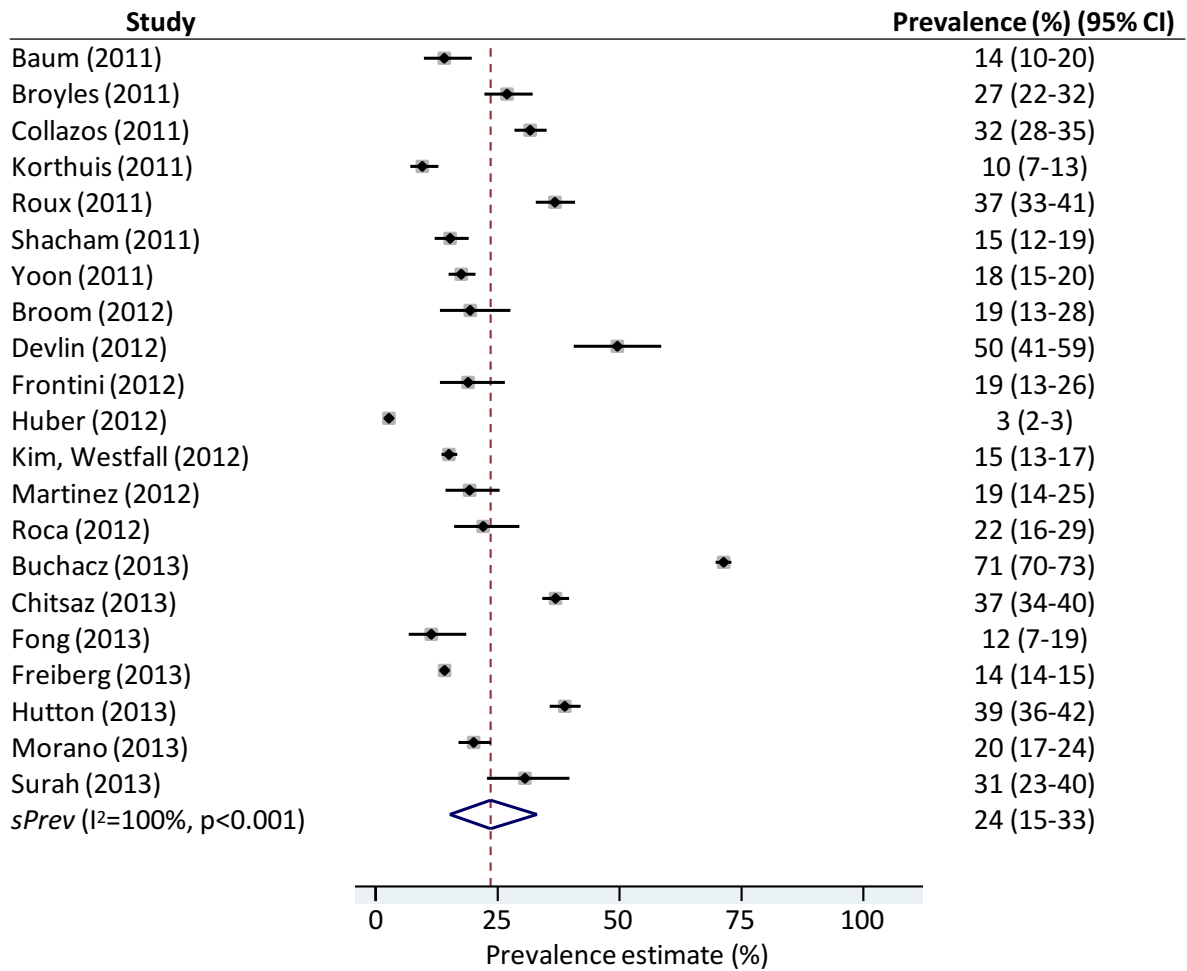

**(c) Obesity prevalence among overall<sup>a</sup>**

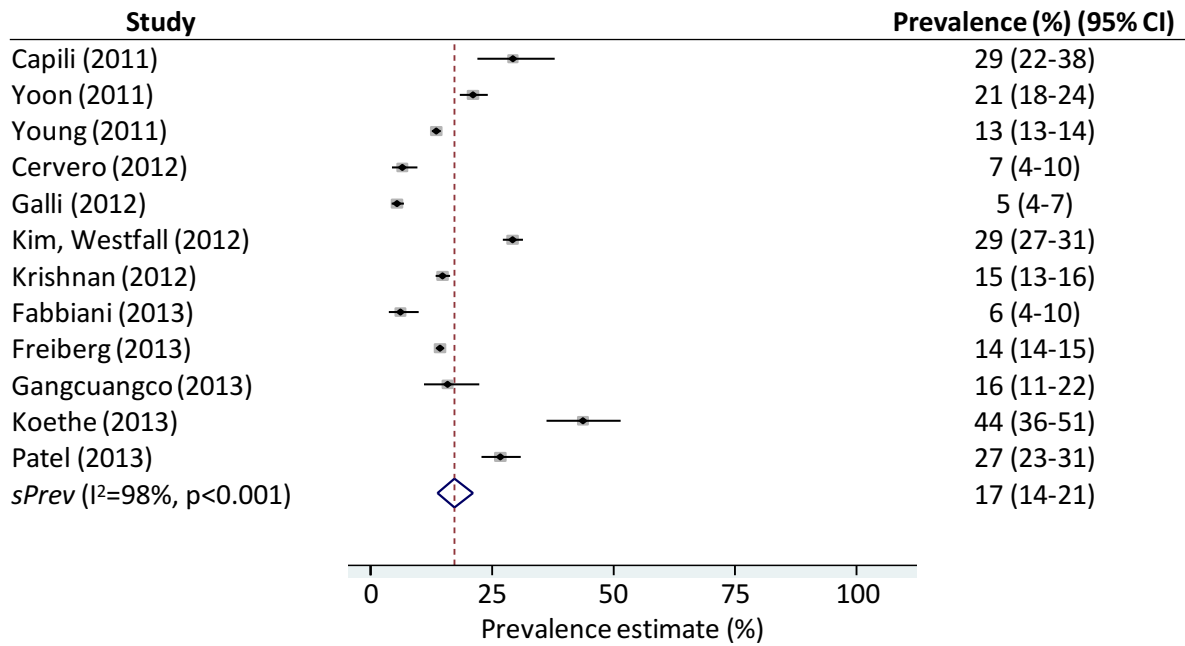

**(d) Cervical high-risk human papillomavirus infection prevalence**

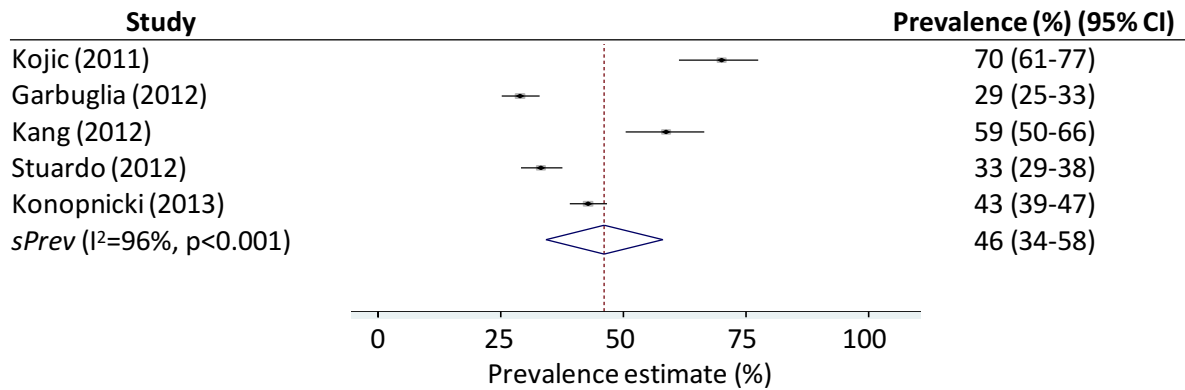

**(e) Oral high-risk human papillomavirus infection prevalence among overall<sup>a</sup>**

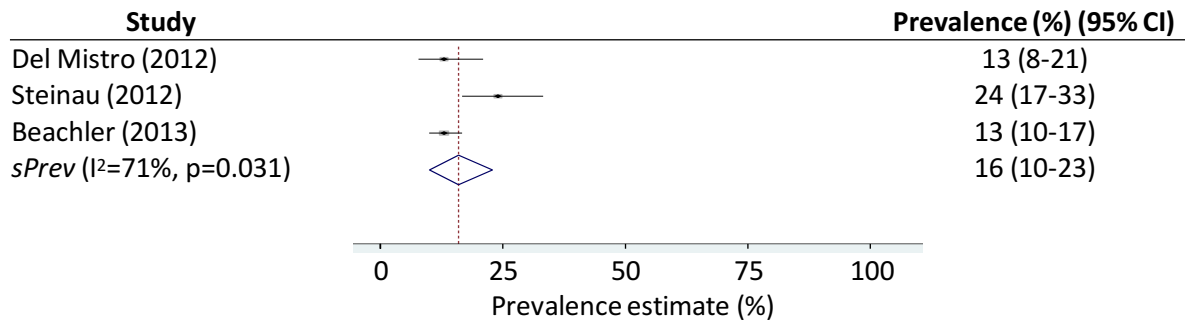

**(f) Anal high-risk human papillomavirus infection prevalence among men who have sex with men**

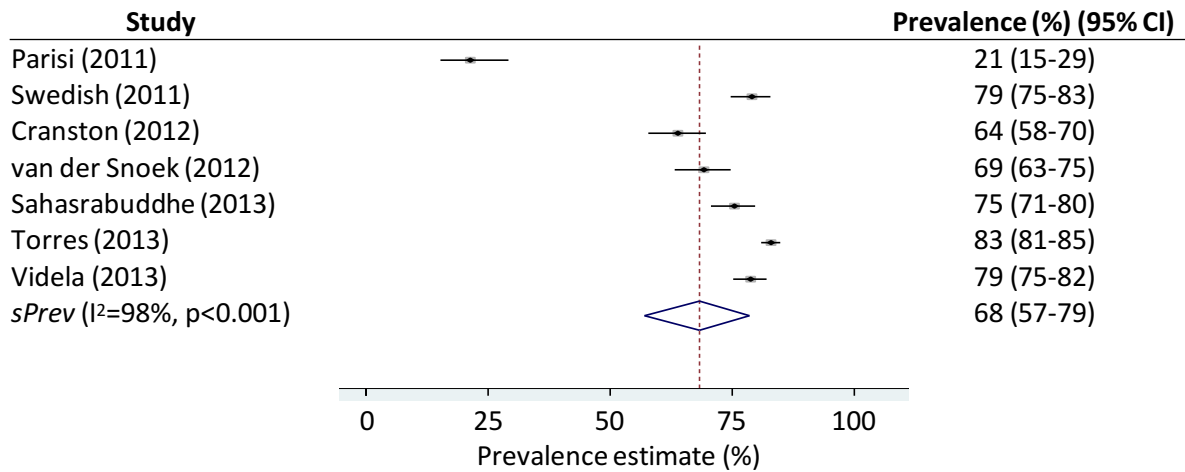

**(g) Hepatitis-C-virus-exposed prevalence among overall<sup>a</sup>**

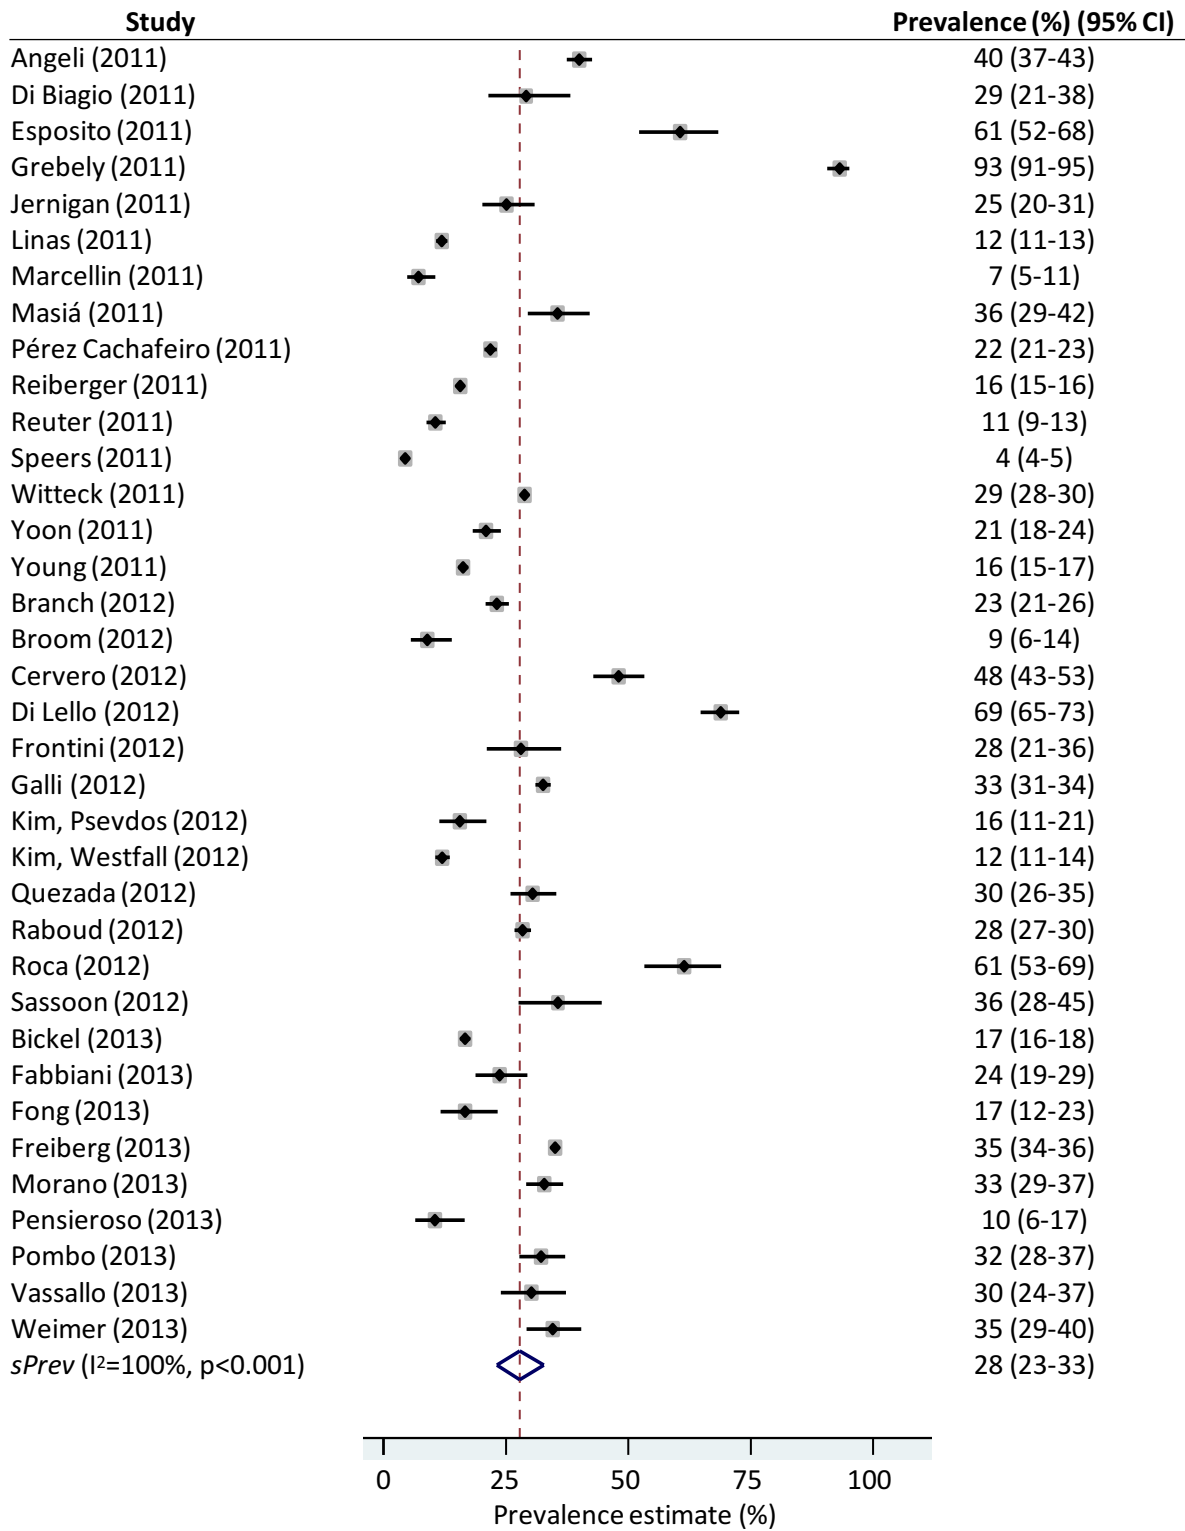

**(h) Chronic hepatitis C virus infection prevalence among overall<sup>a</sup>**

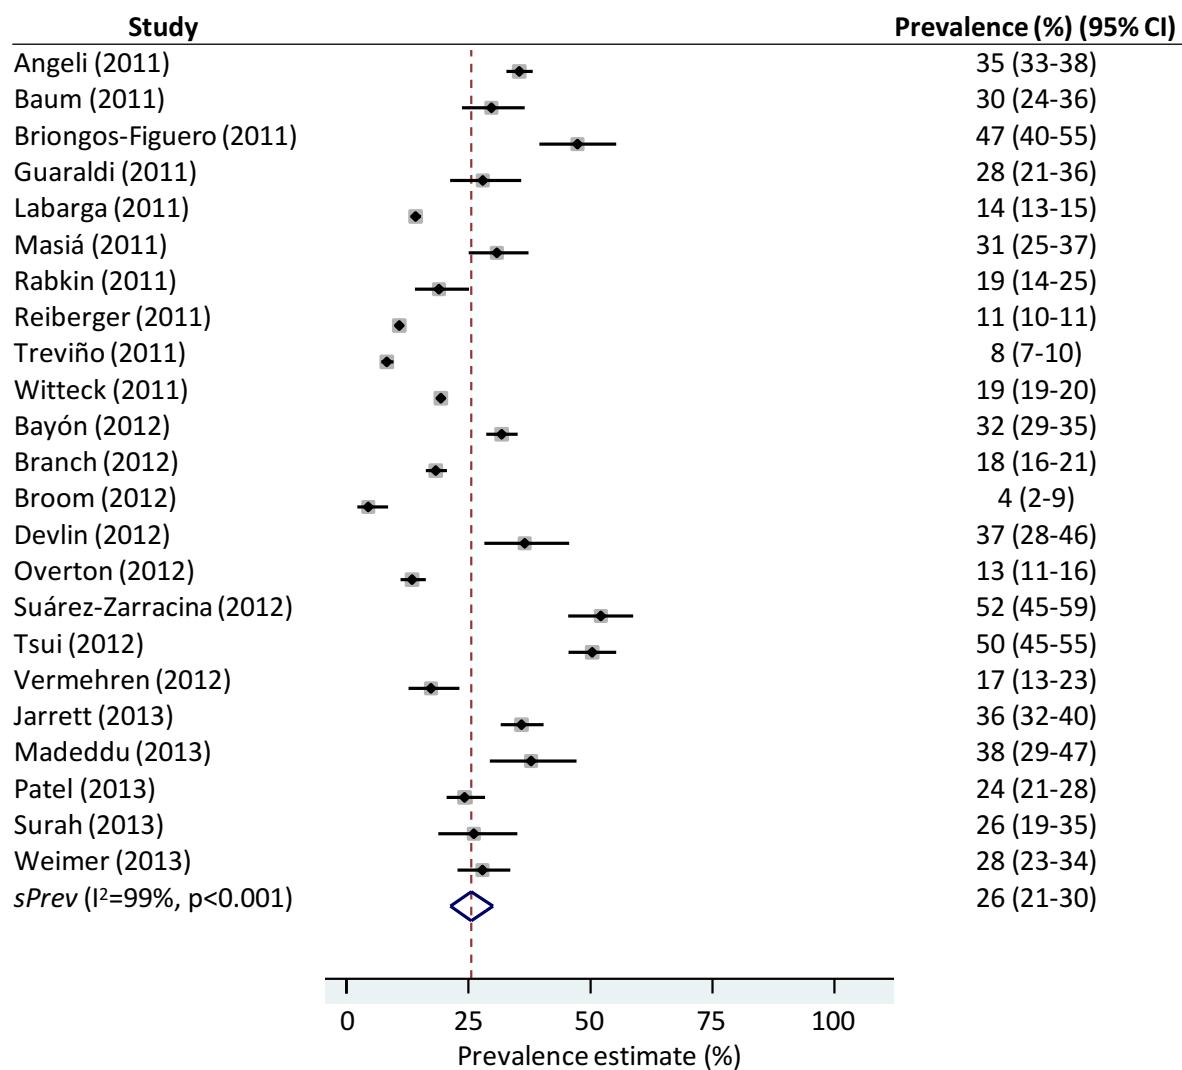

**(i) Hepatitis B virus infection prevalence among overall<sup>a</sup>**

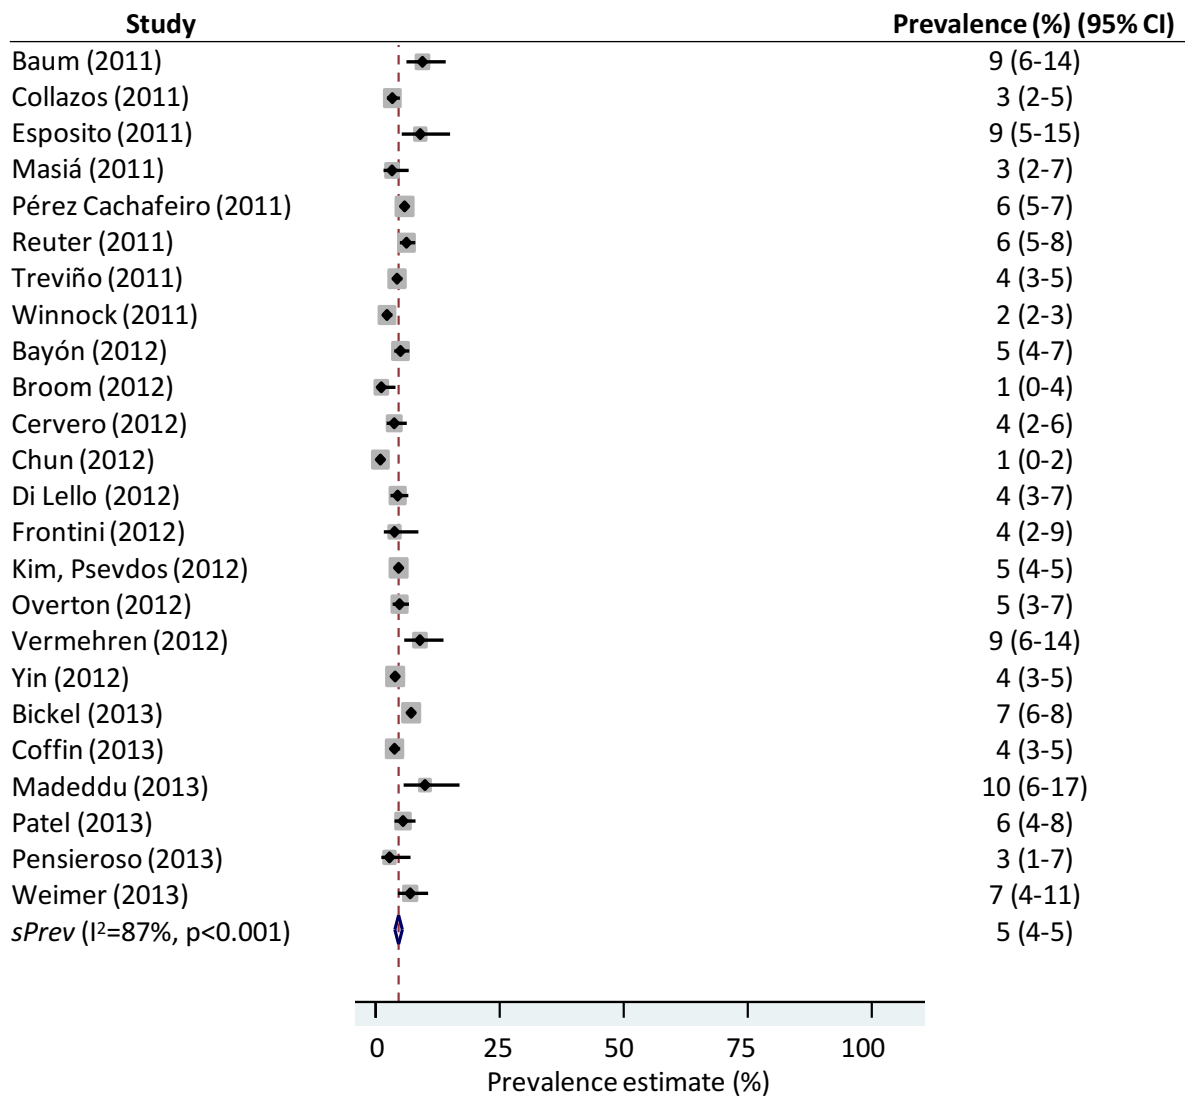

<sup>a</sup>“Overall” refers to study samples unrestricted by sex or HIV transmission category.
