# Supplementary material
Source: PubMed Central journal article supplement (PMC4689318)
Supplement: NIHMS728617-supplement-Supplemental_Data_File_3.pdf [file NIHMS728617-supplement-Supplemental_Data_File_3.pdf]

**Supplemental Table S2. Prevalence of smoking among adult persons living with HIV/AIDS**

| Author<br>(Publication year)               | Country   | Demo-<br>graphic<br>group <sup>a</sup> | N       | Preva-<br>lence (%) | Category | Study category label/definition <sup>b</sup>                                               |
|--------------------------------------------|-----------|----------------------------------------|---------|---------------------|----------|--------------------------------------------------------------------------------------------|
| Baum <i>et al.</i> (2011)<br>[63]          | US        | Overall                                | 192     | 83                  | Current  | “Cigarette smoking” (assumed to be current because baseline characteristic) /no definition |
| Beachler <i>et al.</i> (2012)<br>[91]      | US        | Female                                 | 186     | 46                  | Current  | “Recent cigarette smoking”/≥1 cigarette/day in past 6 months                               |
|                                            |           | MSM                                    | 191     | 33                  | Current  |                                                                                            |
| Briongos Figuero <i>et al.</i> (2011) [64] | Spain     | Overall                                | 150     | 63                  | Current  | “Active smoker”/no definition                                                              |
|                                            |           |                                        |         | 19                  | Former   | “Ex-smoker”/no definition                                                                  |
|                                            |           |                                        |         | 81                  | Ever     | Active smoker + ex-smoker                                                                  |
| Broom <i>et al.</i> (2012)<br>[65]         | Australia | Overall                                | 144     | 42                  | Current  | “Current smoker”/no definition                                                             |
|                                            |           |                                        |         | 21                  | Former   | “Ex-smoker”/not definition                                                                 |
|                                            |           |                                        |         | 63                  | Ever     | Current smoker + ex-smoker                                                                 |
| Broyles <i>et al.</i> (2011)<br>[66]       | US        | Overall                                | 308     | 63                  | Current  | “Tobacco use” (assumed to be current because baseline characteristic)/no definition;       |
| Bryant <i>et al.</i> (2013)<br>[67]        | US        | Overall                                | 115     | 64                  | Current  | “Current smoking”/no definition                                                            |
|                                            |           |                                        |         | 13                  | Former   | “Past but not current smokers”/no definition                                               |
|                                            |           |                                        |         | 77                  | Ever     | Current smoker + past smoker                                                               |
|                                            |           | Female                                 | 43      | 74                  | Current  |                                                                                            |
|                                            |           |                                        |         | 9                   | Former   |                                                                                            |
|                                            |           |                                        |         | 84                  | Ever     |                                                                                            |
| Male                                       | 72        | 58                                     | Current |                     |          |                                                                                            |
|                                            |           | 15                                     | Former  |                     |          |                                                                                            |
|                                            |           | 74                                     | Ever    |                     |          |                                                                                            |
| Buchacz <i>et al.</i> (2013)<br>[101]      | US        | Overall                                | 2,640   | 63                  | Ever     | “History of having ever smoked tobacco”/no definition                                      |
|                                            |           | Female                                 | 584     | 68                  | Ever     |                                                                                            |

|                                     |             |         |        |    |         |                                                           |
|-------------------------------------|-------------|---------|--------|----|---------|-----------------------------------------------------------|
|                                     |             | Male    | 2,056  | 62 | Ever    |                                                           |
| Capili <i>et al.</i> (2011) [68]    | US          | Overall | 123    | 67 | Current | "Current smoker"/ $\geq 1$ cigarette/day in past 30 days  |
| Cervero <i>et al.</i> (2012) [69]   | Spain       | Overall | 352    | 64 | Current | "Tobacco -- Yes" (current per author query)/no definition |
| Chander <i>et al.</i> (2012) [70]   | US          | Overall | 492    | 63 | Current | "Current smokers"/ $\geq 1$ cigarette/day                 |
|                                     |             | Female  | 246    | 59 | Current |                                                           |
|                                     |             | Male    | 246    | 68 | Current |                                                           |
|                                     |             | MSM     | 71     | 59 | Current |                                                           |
|                                     |             | IDU     | 233    | 74 | Current |                                                           |
| Collazos <i>et al.</i> (2011) [71]  | Spain       | Overall | 774    | 85 | Current | "Current tobacco use"/no definition                       |
|                                     |             | Female  | 217    | 80 | Current |                                                           |
|                                     |             | Male    | 557    | 88 | Current |                                                           |
| Esposito <i>et al.</i> (2011) [102] | Italy       | Overall | 125    | 60 | Ever    | "Cigarette smoking present in the history"/no definition  |
| Fabbiani <i>et al.</i> (2013) [72]  | Italy       | Overall | 245    | 54 | Current | "Current smoking"/any cigarette smoking in the past month |
| Fitch <i>et al.</i> (2013) [74]     | US          | Overall | 166    | 62 | Current | "Current smoker"/no definition                            |
| Fong <i>et al.</i> (2013) [103]     | Australia   | Overall | 121    | 47 | Ever    | "History of smoking"/no definition                        |
| Freiberg <i>et al.</i> (2013) [73]  | US          | Overall | 25,510 | 60 | Current | "Current smoking"/no definition                           |
|                                     |             |         |        | 13 | Former  | "Past smoking"/no definition                              |
|                                     |             |         |        | 73 | Ever    | Current smoking + past smoking                            |
| Galli <i>et al.</i> (2012) [75]     | Italy       | Overall | 4,249  | 31 | Current | "Smoking status: current"/no definition                   |
| Huber <i>et al.</i> (2012) [76]     | Switzerland | Overall | 11,056 | 48 | Current | "Smoking status: at last visit period"/no definition      |
|                                     |             |         |        | 20 | Former  | "Former"/no definition                                    |
|                                     |             |         |        | 68 | Ever    | Smoked at last visit period + former                      |
| Jarrett <i>et al.</i> (2013) [77]   | US          | Overall | 567    | 53 | Current | "Current smoker"/no definition                            |
|                                     |             |         |        | 21 | Former  | "Prior smoker"/no definition                              |

|                                          |         |         |       |                |                           |                                                                                                                                                                                     |
|------------------------------------------|---------|---------|-------|----------------|---------------------------|-------------------------------------------------------------------------------------------------------------------------------------------------------------------------------------|
| Kim, Westfall <i>et al.</i> (2012) [104] | US      | Overall | 1,844 | 75<br>43       | Ever<br>Ever              | Current smoker + prior smoker<br>"Tobacco abuse/dependence"<br>(history of tobacco use from medical record per author)/No definition                                                |
| Koethe <i>et al.</i> (2013) [78]         | US      | Overall | 158   | 48             | Current                   | "Active tobacco use" (clarified elsewhere as cigarette smoking status)/no definition                                                                                                |
| Kojic <i>et al.</i> (2011) [92]          | US      | Female  | 120   | 53<br>14<br>67 | Current<br>Former<br>Ever | "Current cigarette smoking"/no definition<br>Ever cigarette smoking – current cigarette smoking<br>"Ever cigarette smoking"/no definition                                           |
| Konopnicki <i>et al.</i> (2013) [93]     | Belgium | Female  | 652   | 28             | Current                   | Inferred current smoker from "non-smoker"/no definition                                                                                                                             |
| Krishnan <i>et al.</i> (2012) [105]      | US      | Overall | 2,247 | 59             | Ever                      | "Ever smoker"/no definition                                                                                                                                                         |
| Madeddu <i>et al.</i> (2013) [79]        | Italy   | Overall | 111   | 57             | Current                   | "Current smokers"/ $\geq 1$ cigarette/day and $\geq 100$ lifetime cigarettes                                                                                                        |
| Marshall <i>et al.</i> (2011) [100]      | US      | IDU     | 312   | 84<br>10       | Current<br>Former         | "Current smoker"/smoked at least once in last 30 days and $\geq 100$ lifetime cigarettes<br>"Former smokers"/smoked $\geq 100$ lifetime cigarettes but none in the previous 30 days |
| Masiá <i>et al.</i> (2011) [80]          | Spain   | Overall | 201   | 94<br>62       | Ever<br>Current           | Current smoker + former smoker<br>"Current smoker"/no definition                                                                                                                    |
| Overton <i>et al.</i> (2012) [81]        | US      | Overall | 670   | 43             | Current                   | "Current smoking"/no definition                                                                                                                                                     |

|                                    |       |         |         |        |         |                                                                                             |                                                  |  |
|------------------------------------|-------|---------|---------|--------|---------|---------------------------------------------------------------------------------------------|--------------------------------------------------|--|
| Pombo <i>et al.</i> (2013) [82]    | Spain | Overall | 388     | 54     | Current | “Smokers” (assumed to be current because baseline characteristic)/no definition             |                                                  |  |
| Quezada <i>et al.</i> (2012) [83]  | Spain | Overall | 374     | 50     | Current | “Smokers” (clarified elsewhere as present tense)/no definition                              |                                                  |  |
| Roca <i>et al.</i> (2012) [84]     | Spain | Overall | 145     | 74     | Current | “Current smoker”/no definition                                                              |                                                  |  |
| Schwartz <i>et al.</i> (2013) [97] | US    | MSM     | 301     | 22     | Current | “Smoked in last 12 months”/no definition                                                    |                                                  |  |
|                                    |       |         |         | 33     | Former  | Did not “smoke in last 12 months” and not a “nonsmoker”/no definition                       |                                                  |  |
|                                    |       |         |         | 304    | 55      | Ever                                                                                        | Smoked in last 12 month + former as stated above |  |
| Shacham <i>et al.</i> (2013) [85]  | US    | Overall | 762     | 49     | Current | “Current smoker”/no definition                                                              |                                                  |  |
| Sharma <i>et al.</i> (2011) [107]  | US    | Female  | 245     | 70     | Ever    | “Smoking history”/no definition                                                             |                                                  |  |
| Shirley <i>et al.</i> (2013) [86]  | US    | Overall | 200     | 29     | Current | “Current smoker”/≥1cigarette/day in last week and ≥100 lifetime cigarettes                  |                                                  |  |
|                                    |       |         |         | 40     | Former  | “Former smoker”/<7 cigarettes within week preceding enrollment and ≥100 lifetime cigarettes |                                                  |  |
|                                    |       |         |         | 69     | Ever    | Current smoker + former smoker                                                              |                                                  |  |
|                                    |       |         |         | Female | 32      | 25                                                                                          | Current                                          |  |
|                                    |       |         |         |        |         | 38                                                                                          | Former                                           |  |
|                                    |       |         |         | Male   | 168     | 63                                                                                          | Ever                                             |  |
|                                    |       | 30      | Current |        |         |                                                                                             |                                                  |  |
|                                    |       | 40      | Former  |        |         |                                                                                             |                                                  |  |
|                                    |       | 70      | Ever    |        |         |                                                                                             |                                                  |  |
|                                    |       | MSM     | 135     | 25     | Current |                                                                                             |                                                  |  |
|                                    |       |         |         | 41     | Former  |                                                                                             |                                                  |  |
|                                    |       |         |         | 66     | Ever    |                                                                                             |                                                  |  |

|                                         |             |         |       |    |         |                                                                                 |
|-----------------------------------------|-------------|---------|-------|----|---------|---------------------------------------------------------------------------------|
|                                         |             | IDU     | 32    | 53 | Current |                                                                                 |
|                                         |             |         |       | 41 | Former  |                                                                                 |
|                                         |             |         |       | 94 | Ever    |                                                                                 |
| Siemieniuk <i>et al.</i> (2013) [94]    | Canada      | Female  | 260   | 29 | Current | "Current smoker"/no definition                                                  |
|                                         |             |         |       | 7  | Former  | "Former smoker"/no definition                                                   |
|                                         |             |         |       | 35 | Ever    | Current smoker + former smoker                                                  |
| Stewart <i>et al.</i> (2011) [87]       | US          | Overall | 289   | 37 | Current | "Current smoking"/Do you currently smoke cigarettes?                            |
|                                         |             | Female  | 127   | 29 | Current |                                                                                 |
|                                         |             | Male    | 162   | 43 | Current |                                                                                 |
| Stuardo <i>et al.</i> (2012) [95]       | Spain       | Female  | 478   | 54 | Current | "Smoking: yes"/no definition                                                    |
|                                         |             |         |       | 18 | Former  | "Ex-smoker"/no definition                                                       |
|                                         |             |         |       | 72 | Ever    | Smoking: yes + ex-smoker                                                        |
| van der Snoek <i>et al.</i> (2012) [98] | Netherlands | MSM     | 250   | 36 | Current | "Current smoker"/no definition                                                  |
| Vassallo <i>et al.</i> (2013) [88]      | France      | Overall | 168   | 27 | Current | "Current smoker"/no definition                                                  |
| Videla <i>et al.</i> (2013) [96]        | Spain       | Male    | 689   | 55 | Current | "Current smoking"/no definition                                                 |
|                                         |             |         |       | 22 | Former  | "Past smoking"/no definition                                                    |
|                                         |             |         |       | 77 | Ever    | Current smoking + past smoking                                                  |
|                                         |             | MSM     | 502   | 49 | Current |                                                                                 |
|                                         |             |         |       | 22 | Former  |                                                                                 |
|                                         |             |         |       | 70 | Ever    |                                                                                 |
| Wieland <i>et al.</i> (2011) [99]       | Germany     | MSM     | 210   | 44 | Current | "Current smoker"/no definition                                                  |
| Winnock <i>et al.</i> (2011) [106]      | France      | Overall | 334   | 83 | Ever    | Inferred from "never-smokers"/no definition                                     |
| Yin <i>et al.</i> (2012) [89]           | US          | Overall | 4,616 | 38 | Current | "Smoking" (assumed to be current because baseline characteristic)/no definition |
| Young <i>et al.</i> (2011) [90]         | US          | Overall | 4,832 | 39 | Current | "Current tobacco smoking"/no definition                                         |

---

---

Abbreviations: IDU, injection drug users; MSM, men who have sex with men.

<sup>a</sup>“Overall” refers to study samples unrestricted by sex or HIV transmission category; “male” refers to male study samples unrestricted by HIV transmission category.

<sup>b</sup>Some definitions were obtained through queries to authors.
