# Supplementary material
Source: PubMed Central journal article supplement (PMC4689318)
Supplement: NIHMS728617-supplement-Supplemental_Data_File_4.pdf [file NIHMS728617-supplement-Supplemental_Data_File_4.pdf]

**Supplemental Table S3. Prevalence of hazardous alcohol consumption among adult persons living with HIV/AIDS**

| Author<br>(Publication year)          | Country   | Demo-<br>graphic<br>group <sup>a</sup> | N      | Preva-<br>lence (%) | Definition <sup>b</sup>                                                                                                              |
|---------------------------------------|-----------|----------------------------------------|--------|---------------------|--------------------------------------------------------------------------------------------------------------------------------------|
| Baum <i>et al.</i> (2011)<br>[63]     | US        | Overall                                | 192    | 14                  | >2 drinks per day.                                                                                                                   |
| Beachler <i>et al.</i> (2012)<br>[91] | US        | MSM                                    | 187    | 8                   | >14 drinks per week<br>in the past 6 months.                                                                                         |
| Broom <i>et al.</i> (2012)<br>[65]    | Australia | Overall                                | 113    | 19                  | History of alcohol<br>use greater than<br>Australian<br>guidelines: >2 drinks<br>on any day or >4<br>drinks on a single<br>occasion. |
| Broyles <i>et al.</i> (2011)<br>[66]  | US        | Overall                                | 308    | 27                  | At-risk current<br>drinking based on<br>the AUDIT-C, score<br>>2 for women and >3<br>for men.                                        |
|                                       |           | Female                                 | 98     | 22                  |                                                                                                                                      |
|                                       |           | Male                                   | 210    | 29                  |                                                                                                                                      |
|                                       |           | MSM                                    | 141    | 27                  |                                                                                                                                      |
|                                       |           | IDU                                    | 43     | 42                  |                                                                                                                                      |
| Buchacz <i>et al.</i> (2013)<br>[101] | US        | Overall                                | 2,994  | 71                  | History (chart<br>notation) of alcohol<br>abuse or<br>dependence or >14<br>drinks per week.                                          |
|                                       |           | Female                                 | 624    | 55                  |                                                                                                                                      |
|                                       |           | Male                                   | 2,370  | 76                  |                                                                                                                                      |
| Chitsaz <i>et al.</i> (2013)<br>[108] | US        | Overall                                | 1,166  | 37                  | Alcohol addiction<br>(past 30 days) based<br>on ASI composite<br>scores ( $\geq 0.15$ ).                                             |
| Collazos <i>et al.</i> (2011)<br>[71] | Spain     | Overall                                | 774    | 32                  | Current alcohol<br>intake $\geq 30$ g/day.                                                                                           |
|                                       |           | Female                                 | 217    | 24                  |                                                                                                                                      |
|                                       |           | Male                                   | 557    | 35                  |                                                                                                                                      |
| Crystal <i>et al.</i> (2012)<br>[119] | US        | Female                                 | 905    | 4                   | >14 drinks per week.                                                                                                                 |
| Devlin <i>et al.</i> (2012)<br>[109]  | US        | Overall                                | 115    | 50                  | Lifetime alcohol<br>dependence.                                                                                                      |
| Fong <i>et al.</i> (2013)<br>[103]    | Australia | Overall                                | 114    | 12                  | History of >3 drink<br>per day for women<br>or >4 drinks per day<br>for men.                                                         |
| Freiberg <i>et al.</i> (2013)<br>[73] | US        | Overall                                | 27,350 | 14                  | History of alcohol<br>abuse or<br>dependence based<br>on ICD-9 codes.                                                                |

|                                                  |             |         |       |    |                                                                                                                                                                                |
|--------------------------------------------------|-------------|---------|-------|----|--------------------------------------------------------------------------------------------------------------------------------------------------------------------------------|
| Frontini <i>et al.</i> (2012) [110]              | US          | Overall | 132   | 19 | History of alcohol binges.                                                                                                                                                     |
| Huber <i>et al.</i> (2012) [76]                  | Switzerland | Overall | 9,301 | 3  | Current alcohol use >40 g/day for women and >60 g/day for men.                                                                                                                 |
| Hutton <i>et al.</i> (2013) [111]                | US          | Overall | 910   | 39 | Consumed alcohol at least once a week and/or >4 drinks on any occasion in the last 3 months.                                                                                   |
|                                                  |             | Female  | 319   | 27 |                                                                                                                                                                                |
|                                                  |             | Male    | 591   | 45 |                                                                                                                                                                                |
|                                                  |             | MSM     | 337   | 50 |                                                                                                                                                                                |
| Kim, Westfall <i>et al.</i> (2012) [104]         | US          | Overall | 1,844 | 15 | History of diagnosis of alcohol abuse or dependence based on ICD-9 codes or AUDIT-C.                                                                                           |
| Korthuis <i>et al.</i> (2011) [112]              | US          | Overall | 407   | 10 | Any drinking to intoxication in the past 30 days based on ASI item.                                                                                                            |
|                                                  |             | Female  | 144   | 5  |                                                                                                                                                                                |
|                                                  |             | Male    | 263   | 12 |                                                                                                                                                                                |
| Martinez <i>et al.</i> (2012) [113]              | US          | Overall | 192   | 19 | >6 drinks on at least one single occasion during the past 30 days.                                                                                                             |
| McGinnis <i>et al.</i> (2013) [120] <sup>c</sup> | US          | Male    | 444   | 22 | CIDI-SAM diagnosis of alcohol abuse or dependence in the past year or >14 drinks over any consecutive 7-day period or >4 drinks in 1 day based on 30-day Timeline Follow Back. |
| Morano <i>et al.</i> (2013) [114]                | US          | Overall | 552   | 20 | >1 drink per day for women or >2 drinks per day for men.                                                                                                                       |
| Roca <i>et al.</i> (2012) [84]                   | Spain       | Overall | 145   | 22 | >9 drinks per week.                                                                                                                                                            |
| Roux <i>et al.</i> (2011) [115]                  | France      | Overall | 544   | 37 | Alcohol abuse, based on AUDIT-C.                                                                                                                                               |
| Shacham <i>et al.</i> (2011) [116]               | US          | Overall | 406   | 15 | >4 drinks per week for women and >5 drinks per week for men in the previous week.                                                                                              |
|                                                  |             | Female  | 140   | 7  |                                                                                                                                                                                |
|                                                  |             | Male    | 266   | 20 |                                                                                                                                                                                |

|                                      |         |         |     |    |                                                                            |
|--------------------------------------|---------|---------|-----|----|----------------------------------------------------------------------------|
| Siemieniuk <i>et al.</i> (2013) [94] | Canada  | Female  | 252 | 2  | >7 drinks per week or any binge since last clinic visit.                   |
| Skeer <i>et al.</i> (2012) [121]     | US      | MSM     | 503 | 20 | >4 drinks in a single day at least once per week within the past 3 months. |
| Surah <i>et al.</i> (2013) [117]     | Ireland | Overall | 111 | 31 | AUDIT score >7.                                                            |
| Yoon <i>et al.</i> (2011) [118]      | US      | Overall | 736 | 18 | AUDIT-C score >3 for women and >4 for men.                                 |

---

Abbreviations: ASI, Addiction Severity Index; AUDIT, Alcohol Use Disorders Identification Test; AUDIT-C, Alcohol Use Disorders Identification Test- consumption; CIDI-SAM, Composite International Diagnostic Interview-Substance Abuse Module; ICD-9, International Classification of Diseases, Ninth Revision; IDU, injection drug users; MSM, men who have sex with men.

<sup>a</sup>“Overall” refers to study samples unrestricted by sex or HIV transmission category; “male” refers to male study samples unrestricted by HIV transmission category.

<sup>b</sup>Some definitions were obtained through queries to authors.

<sup>c</sup>Restricted to subjects who reported having at least one drink in the past year.
