# Supplementary material
Source: PubMed Central journal article supplement (PMC4689318)
Supplement: NIHMS728617-supplement-Supplemental_Data_File_5.pdf [file NIHMS728617-supplement-Supplemental_Data_File_5.pdf]

**Supplemental Table S4. Prevalence of overweight/obesity among adult persons living with HIV/AIDS**

| Author<br>(Publication year)                | Country | Demo-<br>graphic<br>group <sup>a</sup> | N          | Preva-<br>lence (%) | Category           |
|---------------------------------------------|---------|----------------------------------------|------------|---------------------|--------------------|
| Bauer (2011) [124]                          | US      | Overall                                | 102        | 44                  | Overweight/Obesity |
|                                             |         | Female                                 | 43         | 44                  | Overweight/Obesity |
|                                             |         | Male                                   | 59         | 44                  | Overweight/Obesity |
| Blashill <i>et al.</i> (2013)<br>[126]      | US      | MSM                                    | 864        | 12                  | Obesity            |
|                                             |         |                                        |            | 42                  | Overweight         |
|                                             |         |                                        |            | 54                  | Overweight/Obesity |
| Buchacz <i>et al.</i> (2013)<br>[101]       | US      | Female                                 | 581        | 32                  | Obesity            |
|                                             |         | Male                                   | 1,800      | 18                  | Obesity            |
| Capili <i>et al.</i> (2011)<br>[68]         | US      | Overall                                | 123        | 29                  | Obesity            |
|                                             |         |                                        |            | 33                  | Overweight         |
|                                             |         |                                        |            | 63                  | Overweight/Obesity |
| Cervero <i>et al.</i> (2012)<br>[69]        | Spain   | Overall                                | 352        | 7                   | Obesity            |
|                                             |         |                                        |            | 27                  | Overweight         |
|                                             |         |                                        |            | 34                  | Overweight/Obesity |
| Chung <i>et al.</i> (2012)<br>[125]         | US      | Overall                                | 329        | 57                  | Overweight/Obesity |
| Fabbiani <i>et al.</i> (2013)<br>[72]       | Italy   | Overall                                | 245        | 6                   | Obesity            |
| Freiberg <i>et al.</i> (2013)<br>[73]       | US      | Overall                                | 26,872     | 14                  | Obesity            |
| Galli <i>et al.</i> (2012) [75]             | Italy   | Overall                                | 1,306      | 5                   | Obesity            |
|                                             |         |                                        |            | 24                  | Overweight         |
|                                             |         |                                        |            | 30                  | Overweight/Obesity |
| Gangcuangco <i>et al.</i><br>(2013) [122]   | US      | Overall                                | 158        | 16                  | Obesity            |
|                                             |         |                                        |            | 44                  | Overweight         |
|                                             |         |                                        |            | 60                  | Overweight/Obesity |
| Jarrett <i>et al.</i> (2013)<br>[77]        | US      | Overall                                | 567        | 53                  | Overweight/Obesity |
| Kim, Westfall <i>et al.</i><br>(2012) [104] | US      | Overall                                | 1,844      | 29                  | Obesity            |
|                                             |         |                                        |            | 36                  | Overweight         |
|                                             |         |                                        |            | 65                  | Overweight/Obesity |
| Koethe <i>et al.</i> (2013)<br>[78]         | US      | Overall                                | 158        | 44                  | Obesity            |
|                                             |         |                                        |            | 26                  | Overweight         |
|                                             |         |                                        |            | 70                  | Overweight/Obesity |
|                                             |         | Female                                 | 47         | 64                  | Obesity            |
|                                             |         |                                        |            | 17                  | Overweight         |
|                                             |         |                                        |            | 81                  | Overweight/Obesity |
| Male                                        | 111     | 35                                     | Obesity    |                     |                    |
|                                             |         | 30                                     | Overweight |                     |                    |

|                                        |    |         |       |                                                                               |
|----------------------------------------|----|---------|-------|-------------------------------------------------------------------------------|
| Krishnan <i>et al.</i> (2012)<br>[105] | US | Overall | 2,240 | 65 Overweight/Obesity<br>15 Obesity<br>32 Overweight<br>47 Overweight/Obesity |
| Patel <i>et al.</i> (2013)<br>[123]    | US | Overall | 454   | 27 Obesity<br>35 Overweight<br>62 Overweight/Obesity                          |
| Salter <i>et al.</i> (2013)<br>[127]   | US | IDU     | 322   | 18 Obesity<br>28 Overweight<br>46 Overweight/Obesity                          |
| Yoon <i>et al.</i> (2011)<br>[118]     | US | Overall | 764   | 21 Obesity<br>36 Overweight<br>57 Overweight/Obesity                          |
| Young <i>et al.</i> (2011)<br>[90]     | US | Overall | 5,284 | 13 Obesity<br>32 Overweight<br>45 Overweight/Obesity                          |

---

Abbreviations: IDU, injection drug users; MSM, men who have sex with men.

<sup>a</sup>“Overall” refers to study samples unrestricted by sex or HIV transmission category; “male” refers to male study samples unrestricted by HIV transmission category.
