# Supplementary material
Source: PubMed Central journal article supplement (PMC4689318)
Supplement: NIHMS728617-supplement-Supplemental_Data_File_6.pdf [file NIHMS728617-supplement-Supplemental_Data_File_6.pdf]

**Supplemental Table S5. Prevalence of human papillomavirus (HPV) infection among adult persons living with HIV/AIDS**

| Author<br>(Publication year)             | Country | Demo-<br>graphic<br>group <sup>a</sup> | N   | Preva-<br>lence (%) | Category                                           |
|------------------------------------------|---------|----------------------------------------|-----|---------------------|----------------------------------------------------|
| Beachler <i>et al.</i> (2012)<br>[91]    | US      | Female                                 | 187 | 35                  | Oral, any type (36 HPV types)                      |
|                                          |         | MSM                                    | 192 | 45                  |                                                    |
|                                          |         | Female                                 | 187 | 18                  |                                                    |
|                                          |         | MSM                                    | 192 | 23                  |                                                    |
| Beachler <i>et al.</i> (2013)<br>[130]   | US      | Overall                                | 375 | 84                  | Anal, any type (37 HPV types)                      |
|                                          |         | Overall                                | 375 | 67                  | Anal, high-risk types (14 high-risk HPV types)     |
|                                          |         | Overall                                | 386 | 28                  | Oral, any type (37 HPV types)                      |
|                                          |         | Overall                                | 386 | 13                  | Oral, high-risk types (14 high-risk HPV types)     |
| Cranston <i>et al.</i> (2012)<br>[135]   | US      | Male                                   | 316 | 92                  | Anal, any type (29 HPV types)                      |
|                                          |         | MSM                                    | 252 | 92                  |                                                    |
|                                          |         | Male IDU                               | 76  | 93                  | Anal, high-risk types (14 high-risk HPV types)     |
|                                          |         | Male                                   | 316 | 64                  |                                                    |
|                                          |         | MSM                                    | 252 | 64                  |                                                    |
|                                          |         | Male IDU                               | 76  | 68                  |                                                    |
| Del Mistro <i>et al.</i> (2012)<br>[131] | Italy   | Overall                                | 100 | 37                  | Oral, any type ( $\geq 22$ HPV types)              |
|                                          |         | Female                                 | 38  | 32                  |                                                    |
|                                          |         | Male                                   | 62  | 40                  | Oral, high-risk types (12 high-risk HPV types)     |
|                                          |         | MSM                                    | 38  | 42                  |                                                    |
|                                          |         | Overall                                | 100 | 13                  |                                                    |
|                                          |         | Female                                 | 38  | 3                   |                                                    |
|                                          |         | Male                                   | 62  | 19                  |                                                    |
|                                          |         | MSM                                    | 38  | 18                  |                                                    |
| Garbuglia <i>et al.</i> (2012)<br>[128]  | Italy   | Female                                 | 553 | 44                  | Cervical, any type (35 HPV types)                  |
|                                          |         | Female                                 | 526 | 29                  | Cervical, high-risk types (20 high-risk HPV types) |
| Goldstone <i>et al.</i> (2012)<br>[138]  | US      | Overall                                | 132 | 83                  | Anal, high-risk types (13 high-risk HPV types)     |
| Kang <i>et al.</i> (2012)<br>[129]       | US      | Female                                 | 142 | 59                  | Cervical, high-risk types (18 high-risk HPV types) |

|                                          |           |         |       |    |                                                    |
|------------------------------------------|-----------|---------|-------|----|----------------------------------------------------|
| Kojic <i>et al.</i> (2011) [92]          | US        | Female  | 120   | 90 | Anal, any type (37 HPV types)                      |
|                                          |           | Female  | 120   | 85 | Anal, high-risk types (22 high-risk HPV types)     |
|                                          |           | Female  | 120   | 83 | Cervical, any type (37 HPV types)                  |
|                                          |           | Female  | 120   | 70 | Cervical, high-risk types (22 high-risk HPV types) |
| Konopnicki <i>et al.</i> (2013) [93]     | Belgium   | Female  | 652   | 43 | Cervical, high-risk types (13 high-risk HPV types) |
| Parisi <i>et al.</i> (2011) [133]        | Italy     | MSM     | 166   | 89 | Anal, any type (47 HPV types)                      |
|                                          |           | MSM     | 131   | 21 | Anal, high-risk types (14 high-risk HPV types)     |
|                                          |           | MSM     | 134   | 20 | Oral, any type (47 HPV types)                      |
|                                          |           | MSM     | 125   | 2  | Oral, high-risk types (14 high-risk HPV types)     |
| Read <i>et al.</i> (2012) [134]          | Australia | MSM     | 249   | 19 | Oral, any type (37 HPV types)                      |
|                                          |           | MSM     | 249   | 8  | Oral, high-risk types (11 high-risk HPV types)     |
| Sahasrabuddhe <i>et al.</i> (2013) [136] | US        | MSM     | 342   | 94 | Anal, any type (37 HPV types)                      |
|                                          |           | MSM     | 342   | 75 | Anal, high-risk types (13 high-risk HPV types)     |
| Steinau <i>et al.</i> (2012) [132]       | US        | Overall | 100   | 39 | Oral, any type (37 HPV types)                      |
|                                          |           | Overall | 100   | 24 | Oral, high-risk types (22 high-risk HPV types)     |
| Stuardo <i>et al.</i> (2012) [95]        | Spain     | Female  | 479   | 33 | Cervical, high-risk types (13 high-risk HPV types) |
| Swedish <i>et al.</i> (2011) [139]       | US        | MSM     | 386   | 79 | Anal, high-risk types (13 high-risk HPV types)     |
| Torres <i>et al.</i> (2013) [137]        | Spain     | MSM     | 1,439 | 96 | Anal, any type (37 HPV types)                      |

|                                         |             |      |       |    |                                                |
|-----------------------------------------|-------------|------|-------|----|------------------------------------------------|
|                                         |             | MSM  | 1,439 | 83 | Anal, high-risk types (12 high-risk HPV types) |
| van der Snoek <i>et al.</i> (2012) [98] | Netherlands | MSM  | 247   | 91 | Anal, any type (28 HPV types)                  |
|                                         |             | MSM  | 247   | 69 | Anal, high-risk types (15 high-risk HPV types) |
| Videla <i>et al.</i> (2013) [96]        | Spain       | Male | 733   | 73 | Anal, any type (15 HPV types)                  |
|                                         |             | MSM  | 538   | 84 | HPV types)                                     |
|                                         |             | Male | 650   | 16 | Oral, any type (15 HPV types)                  |
|                                         |             | MSM  | 458   | 16 | HPV types)                                     |
|                                         |             | Male | 733   | 67 | Anal, high-risk types (13 high-risk HPV types) |
|                                         |             | MSM  | 538   | 79 | (13 high-risk HPV types)                       |
|                                         |             | Male | 650   | 15 | Oral, high-risk types (13 high-risk HPV types) |
|                                         |             | MSM  | 458   | 13 | (13 high-risk HPV types)                       |

---

Abbreviations: HPV, human papillomavirus; IDU, injection drug users; MSM, men who have sex with men.

<sup>a</sup>“Overall” refers to study samples unrestricted by sex or HIV transmission category; “male” refers to male study samples unrestricted by HIV transmission category.
