# Supplementary material
Source: PubMed Central journal article supplement (PMC4689318)
Supplement: NIHMS728617-supplement-Supplemental_Data_File_7.pdf [file NIHMS728617-supplement-Supplemental_Data_File_7.pdf]

**Supplemental Table S6. Prevalence of hepatitis C virus (HCV) infection among adult persons living with HIV/AIDS**

| Author<br>(Publication year)               | Country   | Demo-<br>graphic<br>group <sup>a</sup> | N     | Preva-<br>lence (%) | Definition <sup>b</sup>                                   |
|--------------------------------------------|-----------|----------------------------------------|-------|---------------------|-----------------------------------------------------------|
| Angeli <i>et al.</i> (2011)<br>[140]       | Italy     | Overall                                | 1,363 | 40                  | Exposed. Positive by HCV antibody test.                   |
|                                            |           | Overall                                | 1,239 | 35                  | Chronic. Positive by both HCV antibody and HCV RNA test.  |
| Barfod <i>et al.</i> (2011)<br>[160]       | Denmark   | MSM                                    | 871   | 5                   | Exposed. Positive by either HCV antibody or HCV RNA test. |
| Baum <i>et al.</i> (2011)<br>[63]          | US        | Overall                                | 192   | 30                  | Chronic. Positive by HCV RNA test.                        |
|                                            |           | Female                                 | 48    | 33                  |                                                           |
|                                            |           | Male                                   | 144   | 28                  |                                                           |
| Bayón <i>et al.</i> (2012)<br>[165]        | Spain     | Overall                                | 799   | 32                  | Chronic. Positive by both HCV antibody and HCV RNA test.  |
| Bickel <i>et al.</i> (2013)<br>[141]       | Germany   | Overall                                | 4,843 | 17                  | Exposed. Positive by HCV antibody test.                   |
| Branch <i>et al.</i> (2012)<br>[142]       | US        | Overall                                | 1,195 | 23                  | Exposed. Positive by HCV antibody test.                   |
|                                            |           | Overall                                | 1,195 | 18                  | Chronic. Positive by both HCV antibody and HCV RNA test.  |
| Briongos Figuero <i>et al.</i> (2011) [64] | Spain     | Overall                                | 150   | 47                  | Chronic. "Chronic HCV infection" (no source stated).      |
| Broom <i>et al.</i> (2012)<br>[65]         | Australia | Overall                                | 180   | 9                   | Exposed. Positive by HCV antibody test.                   |
|                                            |           | Overall                                | 180   | 4                   | Chronic. Positive by both HCV antibody and HCV RNA test.  |
| Cervero <i>et al.</i> (2012)<br>[69]       | Spain     | Overall                                | 352   | 48                  | Exposed. Positive by HCV antibody test.                   |
| Crystal <i>et al.</i> (2012)<br>[119]      | US        | Female                                 | 905   | 20                  | Chronic. Positive by both HCV antibody and HCV RNA test.  |
|                                            |           | Female IDU                             | 246   | 64                  |                                                           |
| Devlin <i>et al.</i> (2012)<br>[109]       | US        | Overall                                | 115   | 37                  | Chronic. Positive by both HCV antibody and HCV RNA test.  |
| Di Biagio <i>et al.</i> (2011)<br>[143]    | Italy     | Overall                                | 110   | 29                  | Exposed. Positive by HCV antibody test.                   |

|                                          |           |         |        |    |                                                                         |
|------------------------------------------|-----------|---------|--------|----|-------------------------------------------------------------------------|
| Di Lello <i>et al.</i> (2012) [144]      | Spain     | Overall | 520    | 69 | Exposed. Positive by HCV antibody test.                                 |
| Esposito <i>et al.</i> (2011) [102]      | Italy     | Overall | 137    | 61 | Exposed. "Co-infected with HCV."                                        |
| Fabbiani <i>et al.</i> (2013) [72]       | Italy     | Overall | 245    | 24 | Exposed. Positive by HCV antibody test.                                 |
| Florida <i>et al.</i> (2013) [159]       | Italy     | Female  | 1,210  | 22 | Exposed. Positive by either HCV antibody or HCV RNA test.               |
| Fong <i>et al.</i> (2013) [103]          | Australia | Overall | 156    | 17 | Exposed. Positive by HCV antibody test.                                 |
| Freiberg <i>et al.</i> (2013) [73]       | US        | Overall | 27,350 | 35 | Exposed. Positive by HCV antibody test or ICD-9 code for HCV infection. |
| Frontini <i>et al.</i> (2012) [110]      | US        | Overall | 132    | 28 | Exposed. Positive by HCV antibody test.                                 |
| Galli <i>et al.</i> (2012) [75]          | Italy     | Overall | 3,450  | 33 | Exposed. Positive by HCV antibody test.                                 |
| Gamage <i>et al.</i> (2011) [161]        | Australia | MSM     | 869    | 13 | Exposed. Positive by HCV antibody test.                                 |
| Grebely <i>et al.</i> (2011) [145]       | Canada    | Overall | 485    | 93 | Exposed. Positive by HCV antibody test.                                 |
| Guaraldi <i>et al.</i> (2011) [166]      | Italy     | Overall | 143    | 28 | Chronic. Positive by both HCV antibody and HCV RNA test.                |
|                                          |           | Female  | 48     | 31 |                                                                         |
|                                          |           | Male    | 95     | 26 |                                                                         |
| Hoover <i>et al.</i> (2012) [162]        | US        | MSM     | 714    | 10 | Exposed. Positive by HCV antibody test.                                 |
| Jarrett <i>et al.</i> (2013) [77]        | US        | Overall | 457    | 36 | Chronic. Positive by both HCV antibody and HCV RNA test.                |
| Jernigan <i>et al.</i> (2011) [146]      | US        | Overall | 251    | 25 | Exposed. Positive by HCV antibody test.                                 |
| Kim, Pseudos <i>et al.</i> (2012) [147]  | US        | Overall | 218    | 16 | Exposed. Positive by HCV antibody test.                                 |
| Kim, Westfall <i>et al.</i> (2012) [104] | US        | Overall | 1,844  | 12 | Exposed. Positive by HCV antibody test.                                 |
| Labarga <i>et al.</i> (2011) [167]       | Spain     | Overall | 4,165  | 14 | Chronic. Positive by both HCV antibody and HCV RNA test.                |
| Linas <i>et al.</i> (2011) [148]         | US        | Overall | 3,143  | 12 | Exposed. Positive by HCV antibody test.                                 |
|                                          |           | Female  | 524    | 15 |                                                                         |
|                                          |           | Male    | 2,619  | 11 |                                                                         |
|                                          |           | IDU     | 304    | 63 |                                                                         |

|                                             |                  |         |       |    |                                                                |
|---------------------------------------------|------------------|---------|-------|----|----------------------------------------------------------------|
| Madeddu <i>et al.</i> (2013) [79]           | Italy            | Overall | 111   | 38 | Chronic. Positive by both HCV antibody and HCV RNA test.       |
| Marcellin <i>et al.</i> (2011) [149]        | France           | Overall | 308   | 7  | Exposed. Positive by HCV antibody test.                        |
| Masiá <i>et al.</i> (2011) [80]             | Spain            | Overall | 214   | 36 | Exposed. Positive by HCV antibody test.                        |
|                                             |                  | Overall | 214   | 31 | Chronic. Positive by both HCV antibody and HCV RNA test.       |
|                                             |                  | Female  | 51    | 21 |                                                                |
|                                             |                  | Male    | 163   | 34 |                                                                |
|                                             |                  | MSM     | 60    | 0  |                                                                |
|                                             | IDU              | 73      | 83    |    |                                                                |
| Matser <i>et al.</i> (2013) [163]           | Netherlands      | MSM     | 786   | 12 | Exposed. Positive by HCV antibody test.                        |
|                                             |                  | MSM     | 786   | 6  | Chronic. Positive by both HCV antibody and HCV RNA test.       |
| Morano <i>et al.</i> (2013) [114]           | US               | Overall | 601   | 33 | Exposed. Positive by HCV antibody test.                        |
|                                             |                  | Female  | 214   | 27 |                                                                |
|                                             |                  | Male    | 338   | 40 |                                                                |
|                                             |                  | MSM     | 44    | 27 |                                                                |
|                                             |                  | IDU     | 239   | 71 |                                                                |
| Overton <i>et al.</i> (2012) [81]           | US               | Overall | 662   | 13 | Chronic. Medical record indication of "chronic HCV infection." |
| Parisi <i>et al.</i> (2011) [133]           | Italy            | MSM     | 133   | 3  | Exposed. Positive by HCV antibody test.                        |
| Patel <i>et al.</i> (2013) [123]            | US               | Overall | 454   | 24 | Chronic. Medical record indication of "chronic HCV infection." |
| Pensieroso <i>et al.</i> (2013) [150]       | Sweden and Italy | Overall | 143   | 10 | Exposed. Positive by HCV antibody test.                        |
| Pérez Cachafeiro <i>et al.</i> (2011) [151] | Spain            | Overall | 3,867 | 22 | Exposed. Positive by HCV antibody test.                        |
|                                             |                  | Female  | 855   | 24 |                                                                |
|                                             |                  | Male    | 3,012 | 21 |                                                                |
|                                             |                  | MSM     | 1,670 | 4  |                                                                |
|                                             |                  | IDU     | 639   | 90 |                                                                |
| Pombo <i>et al.</i> (2013) [82]             | Spain            | Overall | 379   | 32 | Exposed. Positive by HCV antibody test.                        |
| Quezada <i>et al.</i> (2012) [83]           | Spain            | Overall | 372   | 30 | Exposed. Positive by HCV antibody test.                        |
| Rabkin <i>et al.</i> (2011) [168]           | US               | Overall | 190   | 19 | Chronic. No source stated, but study                           |
|                                             |                  | Female  | 24    | 21 |                                                                |

|                                             |                     |         |       |    |                        |
|---------------------------------------------|---------------------|---------|-------|----|------------------------|
|                                             |                     | Male    | 166   | 19 | title indicated        |
|                                             |                     | MSM     | 143   | 16 | “chronic hepatitis C.” |
| Raboud <i>et al.</i> (2012) [152]           | Canada              | Overall | 2,706 | 28 | Exposed. Positive by   |
|                                             |                     | Female  | 564   | 42 | HCV antibody or HCV    |
|                                             |                     | Male    | 2,142 | 25 | RNA test or physician  |
|                                             |                     | MSM     | 906   | 7  | report or self-report. |
|                                             |                     | IDU     | 604   | 86 |                        |
| Raymond <i>et al.</i> (2012) [173]          | US                  | MSM     | 108   | 16 | Chronic. Positive by   |
|                                             |                     | MSM IDU | 35    | 23 | HCV antibody test      |
|                                             |                     |         |       |    | with a signal-to-      |
|                                             |                     |         |       |    | cutoff ratio of at     |
|                                             |                     |         |       |    | least 5.               |
| Reiberger <i>et al.</i> (2011) [153]        | Germany and Austria | Overall | 9,524 | 16 | Exposed. Positive by   |
|                                             |                     | Overall | 9,524 | 11 | HCV antibody test.     |
|                                             |                     |         |       |    | Chronic. Positive by   |
|                                             |                     |         |       |    | both HCV antibody      |
|                                             |                     |         |       |    | and HCV RNA test.      |
| Reuter <i>et al.</i> (2011) [154]           | Germany             | Overall | 918   | 11 | Exposed. Positive by   |
|                                             |                     |         |       |    | HCV antibody test.     |
| Roca <i>et al.</i> (2012) [84]              | Spain               | Overall | 145   | 61 | Exposed. Positive by   |
|                                             |                     |         |       |    | HCV antibody test.     |
| Salter <i>et al.</i> (2013) [127]           | US                  | IDU     | 346   | 93 | Exposed. Positive by   |
|                                             |                     |         |       |    | HCV antibody test.     |
| Sassoon <i>et al.</i> (2012) [155]          | US                  | Overall | 118   | 36 | Exposed. Positive by   |
|                                             |                     |         |       |    | HCV antibody test.     |
| Sharma <i>et al.</i> (2011) [107]           | US                  | Female  | 245   | 36 | Exposed. Positive by   |
|                                             |                     |         |       |    | HCV antibody test.     |
| Speers <i>et al.</i> (2011) [156]           | US                  | Overall | 6,849 | 4  | Exposed. Positive by   |
|                                             |                     |         |       |    | either HCV antibody,   |
|                                             |                     |         |       |    | HCV RNA or             |
|                                             |                     |         |       |    | genotype test, or a    |
|                                             |                     |         |       |    | medical record         |
|                                             |                     |         |       |    | indication of “HCV     |
|                                             |                     |         |       |    | infection.”            |
| Suárez-Zarracina <i>et al.</i> (2012) [169] | Spain               | Overall | 213   | 52 | Chronic. Positive by   |
|                                             |                     | Female  | 69    | 52 | both HCV antibody      |
|                                             |                     | Male    | 144   | 52 | and HCV RNA test.      |
|                                             |                     | MSM     | 28    | 0  |                        |
|                                             |                     | IDU     | 107   | 93 |                        |
| Surah <i>et al.</i> (2013) [117]            | Ireland             | Overall | 111   | 26 | Chronic. Positive by   |
|                                             |                     |         |       |    | both HCV antibody      |
|                                             |                     |         |       |    | and HCV RNA test.      |
| Treviño <i>et al.</i> (2011) [170]          | Spain               | Overall | 1,854 | 8  | Chronic. Positive by   |
|                                             |                     | MSM     | 1,290 | 2  | both HCV antibody      |
|                                             |                     | IDU     | 102   | 68 | and HCV RNA test.      |

|                                         |                                     |         |        |    |                                                                                                              |
|-----------------------------------------|-------------------------------------|---------|--------|----|--------------------------------------------------------------------------------------------------------------|
| Tsui <i>et al.</i> (2012) [171]         | US                                  | Overall | 397    | 50 | Chronic. Positive by both HCV antibody and HCV RNA test.                                                     |
|                                         |                                     | Female  | 100    | 54 |                                                                                                              |
|                                         |                                     | Male    | 297    | 49 |                                                                                                              |
|                                         |                                     | IDU     | 56     | 84 |                                                                                                              |
| van der Helm <i>et al.</i> (2011) [164] | Germany, France, Switzerland and UK | MSM     | 1,663  | 8  | Exposed. Positive by either HCV antibody or HCV RNA.                                                         |
| Vassallo <i>et al.</i> (2013) [88]      | France                              | Overall | 179    | 30 | Exposed. Positive by HCV antibody test.                                                                      |
|                                         |                                     | Female  | 48     | 40 |                                                                                                              |
|                                         |                                     | Male    | 131    | 27 |                                                                                                              |
|                                         |                                     | IDU     | 37     | 92 |                                                                                                              |
| Vermehren <i>et al.</i> (2012) [172]    | Germany                             | Overall | 202    | 17 | Chronic. Positive by HCV RNA test.                                                                           |
| Weimer <i>et al.</i> (2013) [157]       | Italy                               | Overall | 275    | 35 | Exposed. Positive by HCV antibody test.                                                                      |
|                                         |                                     | Overall | 262    | 28 | Chronic. Positive by both HCV antibody and HCV RNA test.                                                     |
| Witteck <i>et al.</i> (2011) [158]      | Switzerland                         | Overall | 11,527 | 29 | Exposed. Positive by HCV antibody test.                                                                      |
|                                         |                                     | Overall | 10,361 | 19 | Chronic. Positive by both HCV antibody and HCV RNA test.                                                     |
| Yoon <i>et al.</i> (2011) [118]         | US                                  | Overall | 764    | 21 | Exposed. Positive by either HCV antibody, HCV RNA or genotype test.                                          |
|                                         |                                     | Female  | 100    | 27 |                                                                                                              |
|                                         |                                     | Male    | 664    | 20 |                                                                                                              |
|                                         |                                     | MSM     | 417    | 9  |                                                                                                              |
|                                         |                                     | IDU     | 191    | 52 |                                                                                                              |
| Young <i>et al.</i> (2011) [90]         | US                                  | Overall | 5,054  | 16 | Exposed. Positive by either HCV antibody or HCV RNA test, or a medical record indication of "HCV infection." |

Abbreviations: HCV, hepatitis C virus; ICD-9, International Classification of Diseases, Ninth Revision; IDU, injection drug users; MSM, men who have sex with men.

<sup>a</sup>"Overall" refers to study samples unrestricted by sex or HIV transmission category; "male" refers to male study samples unrestricted by HIV transmission category.

<sup>b</sup>Some definitions were obtained through queries to authors.
