# Supplementary material
Source: PubMed Central journal article supplement (PMC4689318)
Supplement: NIHMS728617-supplement-Supplemental_Data_File_8.pdf [file NIHMS728617-supplement-Supplemental_Data_File_8.pdf]

**Supplemental Table S7. Prevalence of hepatitis B virus (HBV) infection among adult persons living with HIV/AIDS**

| Author<br>(Publication year)               | Country   | Demo-<br>graphic<br>group <sup>a</sup> | N     | Preva-<br>lence (%) | Definition <sup>b</sup>                                                                                                         |
|--------------------------------------------|-----------|----------------------------------------|-------|---------------------|---------------------------------------------------------------------------------------------------------------------------------|
| Baum <i>et al.</i> (2011)<br>[63]          | US        | Overall                                | 212   | 9                   | Positive by HBV surface antigen test.                                                                                           |
| Bayón <i>et al.</i> (2012)<br>[165]        | Spain     | Overall                                | 799   | 5                   | Positive by HBV surface antigen test.                                                                                           |
| Bickel <i>et al.</i> (2013)<br>[141]       | Germany   | Overall                                | 4,154 | 7                   | Positive by HBV surface antigen test.                                                                                           |
| Broom <i>et al.</i> (2012)<br>[65]         | Australia | Overall                                | 179   | 1                   | Positive by HBV surface antigen test and negative by IgM antibodies to HBV core antigen test.                                   |
| Cervero <i>et al.</i> (2012)<br>[69]       | Spain     | Overall                                | 352   | 4                   | Positive by HBV surface antigen test.                                                                                           |
| Chun <i>et al.</i> (2012)<br>[174]         | US        | Overall                                | 775   | 1                   | Positive by HBV surface antigen test.                                                                                           |
| Coffin <i>et al.</i> (2013)<br>[175]       | Canada    | Overall                                | 1,400 | 4                   | Positive by HBV surface antigen test.                                                                                           |
| Collazos <i>et al.</i> (2011)<br>[71]      | Spain     | Overall                                | 782   | 3                   | Positive by HBV surface antigen test.                                                                                           |
|                                            |           | Female                                 | 219   | 3                   |                                                                                                                                 |
|                                            |           | Male                                   | 563   | 4                   |                                                                                                                                 |
| Di Lello <i>et al.</i> (2012)<br>[144]     | Spain     | Overall                                | 520   | 4                   | Positive by HBV surface antigen test.                                                                                           |
| Esposito <i>et al.</i> (2011)<br>[102]     | Italy     | Overall                                | 134   | 9                   | Medical record indication of “co-infected with HBV.”                                                                            |
| Florida <i>et al.</i> (2013)<br>[159]      | Italy     | Female                                 | 1,191 | 11                  | Positive by either HBV surface antigen or HBV DNA test.                                                                         |
| Frontini <i>et al.</i> (2012)<br>[110]     | US        | Overall                                | 132   | 4                   | Positive by HBV surface antigen test.                                                                                           |
| Hoover <i>et al.</i> (2012)<br>[162]       | US        | MSM                                    | 696   | 1                   | Medical record indication of “chronically infected” with HBV.                                                                   |
| Kim, Pseudos <i>et al.</i> (2012)<br>[147] | US        | Overall                                | 4,721 | 5                   | Positive by HBV surface antigen test.                                                                                           |
| Madeddu <i>et al.</i> (2013)<br>[79]       | Italy     | Overall                                | 111   | 10                  | Positive by either HBV surface antigen, HBV e Antigen or HBV DNA test, and negative by IgM antibodies to HBV core antigen test. |

|                                             |                  |         |       |   |                                                                                           |
|---------------------------------------------|------------------|---------|-------|---|-------------------------------------------------------------------------------------------|
| Masiá <i>et al.</i> (2011) [80]             | Spain            | Overall | 214   | 3 | Positive by HBV surface antigen test.                                                     |
| Overton <i>et al.</i> (2012) [81]           | US               | Overall | 651   | 5 | Medical record indication of "chronic HBV infection."                                     |
| Patel <i>et al.</i> (2013) [123]            | US               | Overall | 454   | 6 | Medical record indication of "chronic HBV infection."                                     |
| Pensieroso <i>et al.</i> (2013) [150]       | Sweden and Italy | Overall | 143   | 3 | Positive by HBV surface antigen test.                                                     |
| Pérez Cachafeiro <i>et al.</i> (2011) [151] | Spain            | Overall | 3,824 | 6 | Positive by HBV surface antigen test.                                                     |
|                                             |                  | Female  | 872   | 4 |                                                                                           |
|                                             |                  | Male    | 2,952 | 6 |                                                                                           |
|                                             |                  | MSM     | 1,584 | 6 |                                                                                           |
|                                             |                  | IDU     | 618   | 8 |                                                                                           |
| Reuter <i>et al.</i> (2011) [154]           | Germany          | Overall | 918   | 6 | Positive by either HBV surface antigen or HBV DNA test.                                   |
|                                             |                  | Female  | 149   | 4 | Positive by HBV DNA test.                                                                 |
|                                             |                  | Male    | 405   | 7 |                                                                                           |
|                                             |                  | MSM     | 248   | 8 |                                                                                           |
|                                             |                  | IDU     | 36    | 6 |                                                                                           |
| Treviño <i>et al.</i> (2011) [170]          | Spain            | Overall | 1,854 | 4 | Positive by HBV surface antigen, and negative by IgM antibodies to HBV core antigen test. |
| Vermehren <i>et al.</i> (2012) [172]        | Germany          | Overall | 202   | 9 | Positive by HBV surface antigen test.                                                     |
| Weimer <i>et al.</i> (2013) [157]           | Italy            | Overall | 275   | 7 | Positive by HBV surface antigen test.                                                     |
| Winnock <i>et al.</i> (2011) [106]          | France           | Overall | 1,056 | 2 | Positive by HBV surface antigen test.                                                     |
| Yin <i>et al.</i> (2012) [89]               | US               | Overall | 4,575 | 4 | Positive by HBV surface antigen test or medical record indication of "HBV infection."     |

Abbreviations: HBV, hepatitis B virus; IDU, injection drug users; MSM, men who have sex with men.

<sup>a</sup>"Overall" refers to study samples unrestricted by sex or HIV transmission category; "male" refers to male study samples unrestricted by HIV transmission category.

<sup>b</sup>Some definitions were obtained through queries to authors.
