# Supplementary material
Source: PubMed Central journal article supplement (PMC4689318)
Supplement: NIHMS728617-supplement-Supplemental_Data_File_9.pdf [file NIHMS728617-supplement-Supplemental_Data_File_9.pdf]

**Supplemental Figure S2. Funnel plots for prevalence estimates for cancer risk factors among adult persons living with HIV/AIDS in Western high-income countries with  $\geq 10$  individual studies.**

**(a) Current smoking prevalence among overall<sup>a</sup>**

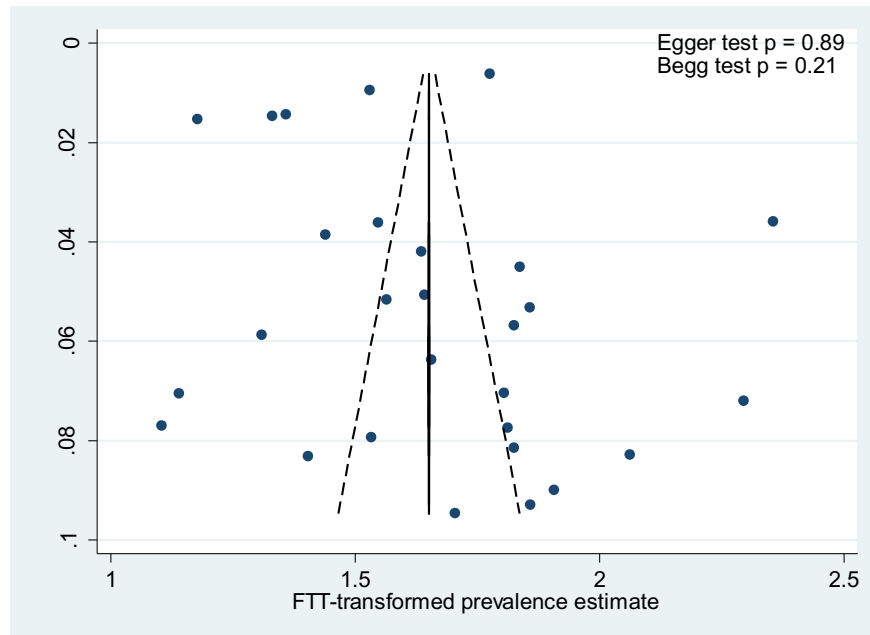

**(b) Current smoking prevalence among female**

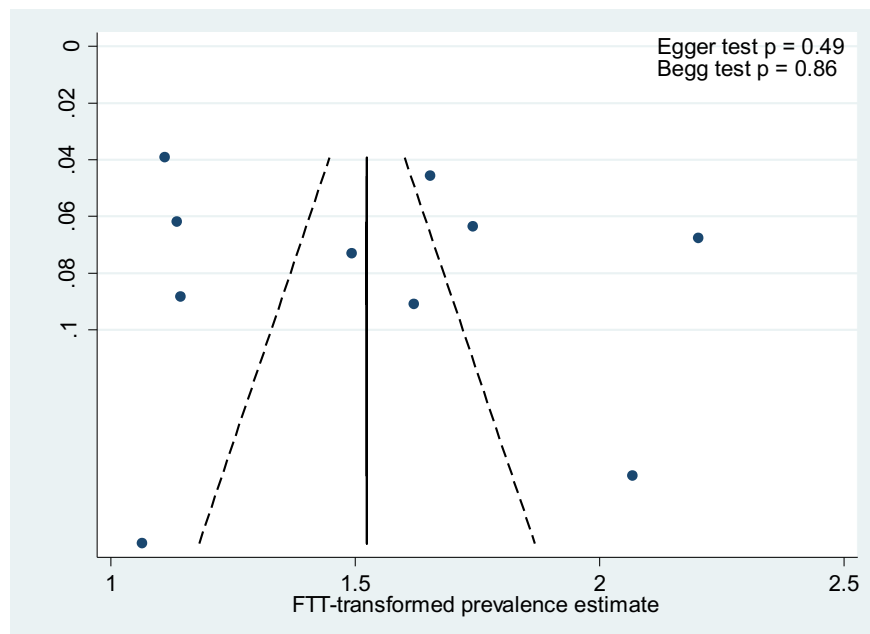

**(c) Ever smoking prevalence among overall<sup>a</sup>**

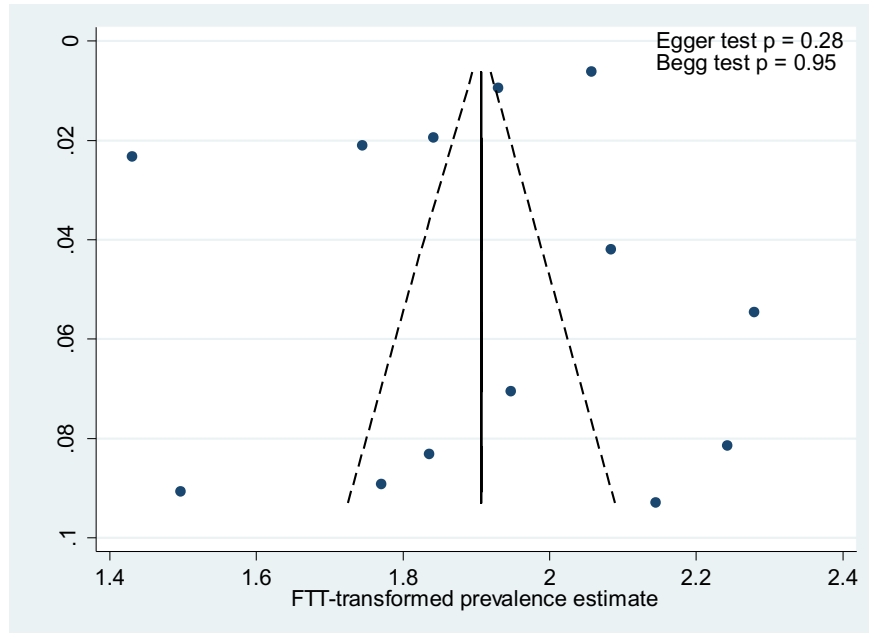

**(d) Hazardous alcohol consumption prevalence among overall<sup>a</sup>**

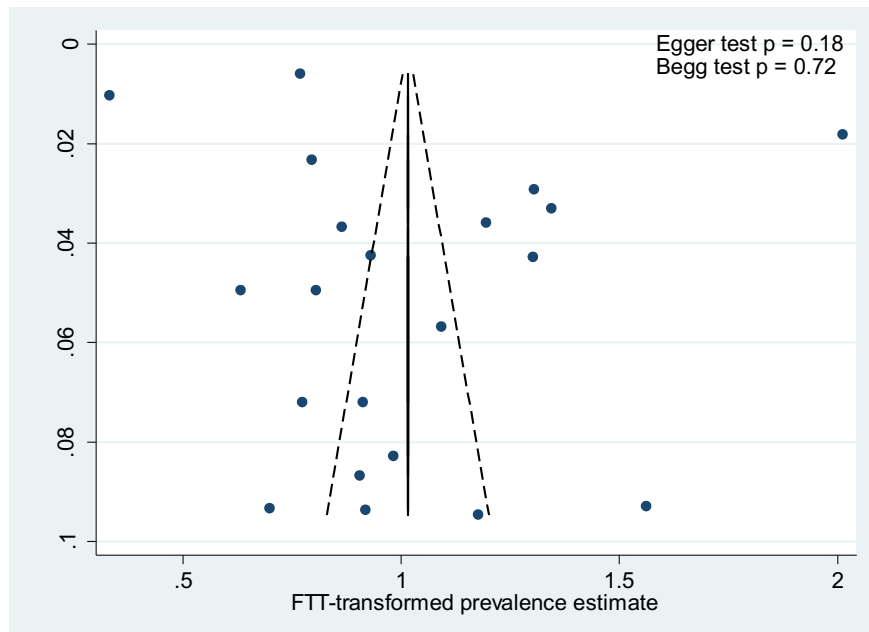

**(e) Obesity prevalence among overall<sup>a</sup>**

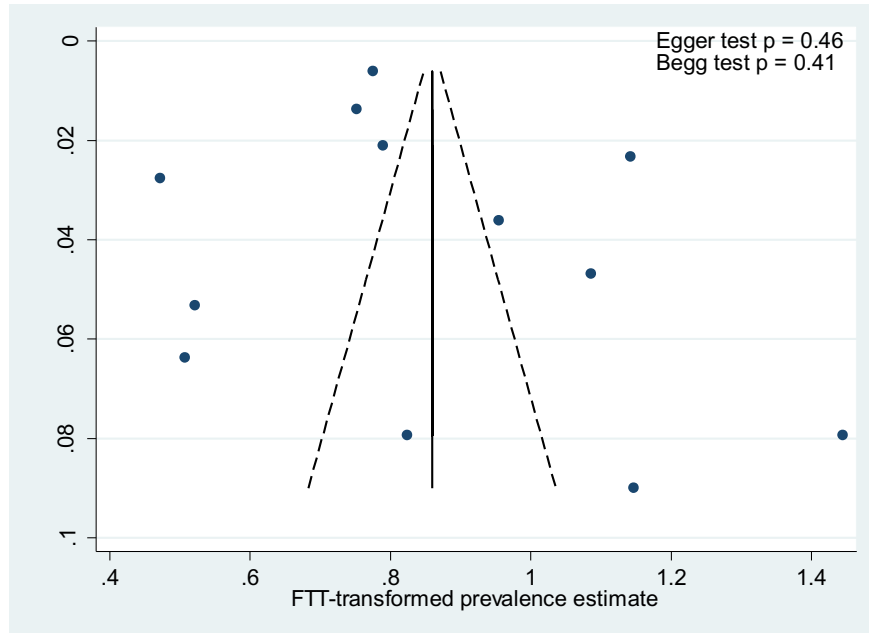

**(f) Overweight prevalence among overall<sup>a</sup>**

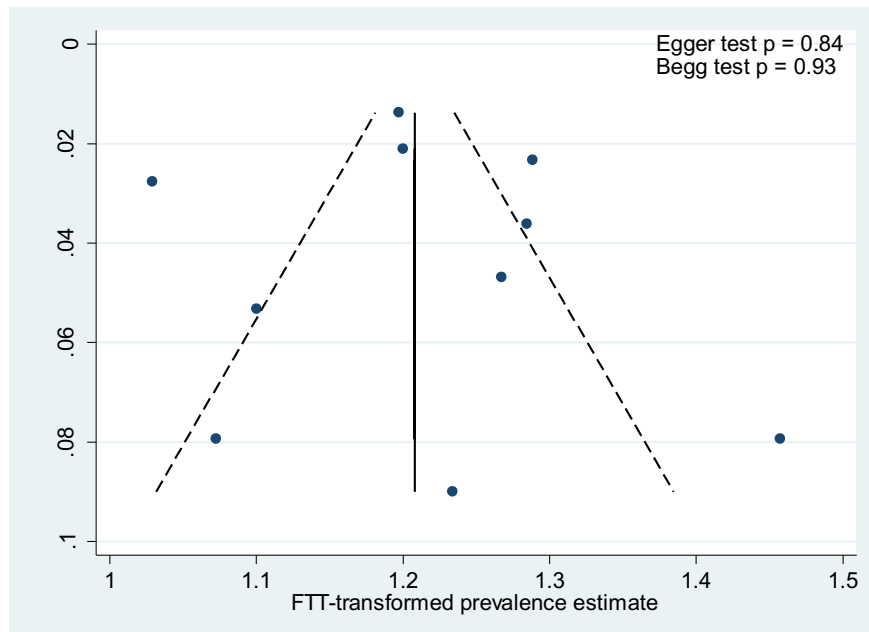

**(g) Overweight/obesity prevalence among overall<sup>a</sup>**

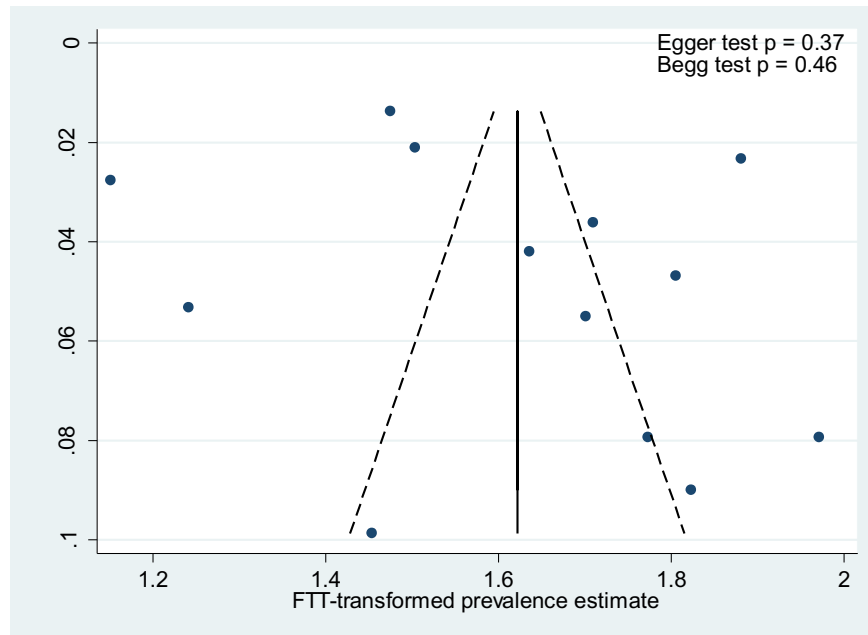

**(h) Hepatitis-C-virus-exposed prevalence among overall<sup>a</sup>**

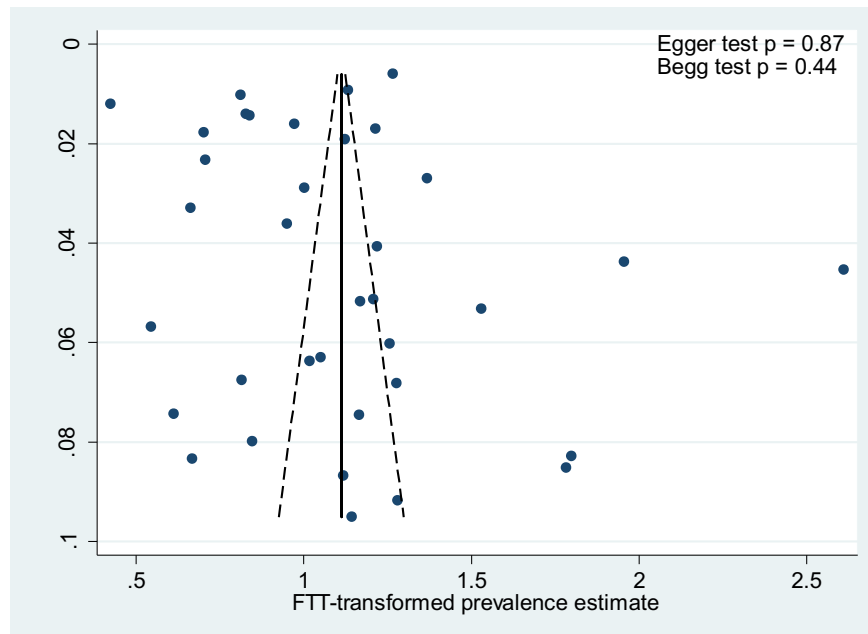

**(i) Hepatitis-C-virus-exposed prevalence among men who have sex with men**

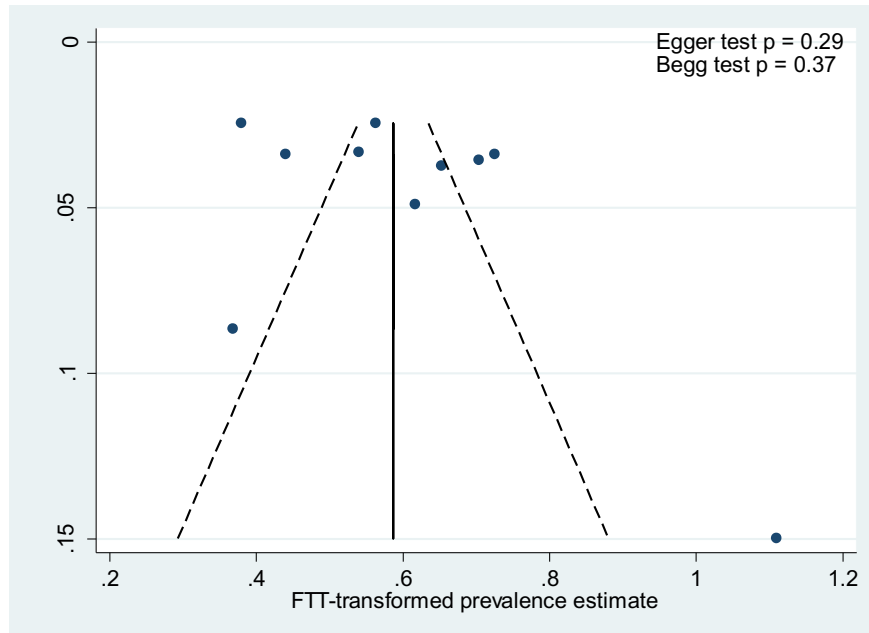

**(j) Chronic hepatitis C virus infection prevalence among overall<sup>a</sup>**

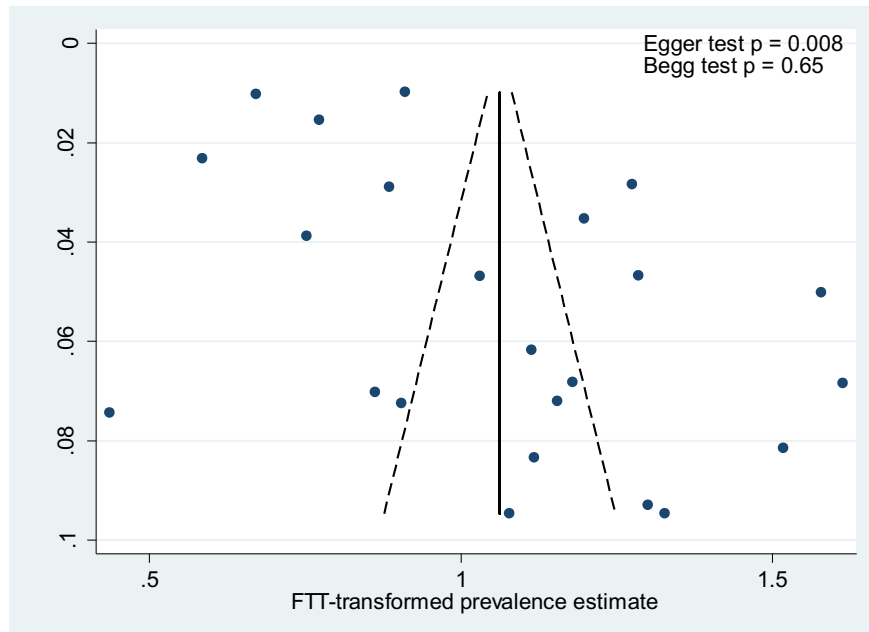

**(k) Hepatitis B virus infection prevalence among overall<sup>a</sup>**

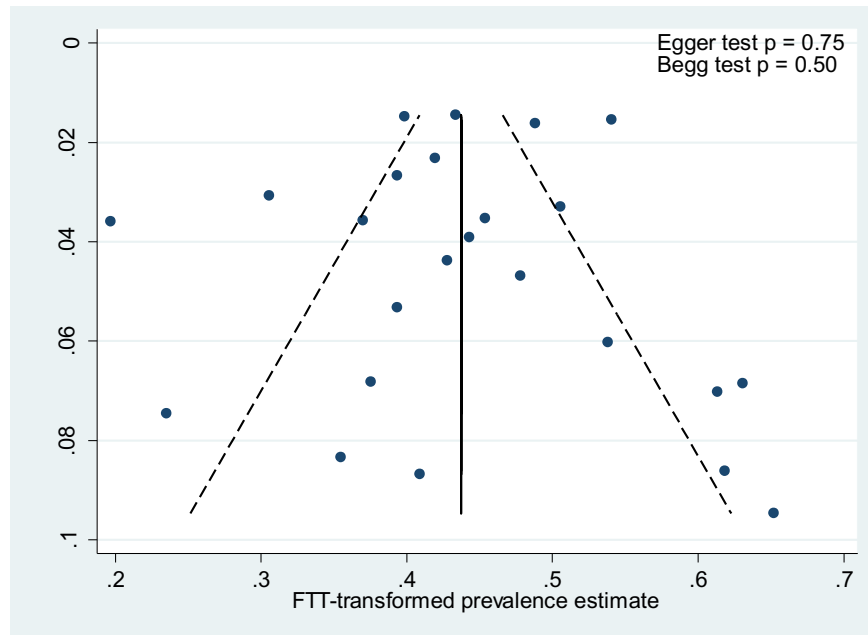

---

Abbreviations: FTT, Freeman-Tukey double arcsine transformation.

<sup>a</sup>“Overall” refers to study samples unrestricted by sex or HIV transmission category.
